# Nonlinear convergence boosts information coding in circuits with parallel outputs

Gabrielle J. Gutierrez<sup>a,b,2</sup>, Fred Rieke<sup>b,1</sup>, and Eric T. Shea-Brown<sup>a,1</sup>

<sup>a</sup>University of Washington, Department of Applied Mathematics; <sup>b</sup>University of Washington, Department of Physiology and Biophysics

This manuscript was compiled on October 14, 2020

1 **Neural circuits are structured with layers of converging and diverg-**  
2 **ing connectivity, and selectivity-inducing nonlinearities at neurons**  
3 **and synapses. These components have the potential to hamper an**  
4 **accurate encoding of the circuit inputs. Past computational studies**  
5 **have optimized the nonlinearities of single neurons, or connection**  
6 **weights in networks, to maximize encoded information, but have not**  
7 **grappled with the simultaneous impact of convergent circuit struc-**  
8 **ture and nonlinear response functions for efficient coding. Our ap-**  
9 **proach is to compare model circuits with different combinations of**  
10 **convergence, divergence, and nonlinear neurons to discover how in-**  
11 **teractions between these components affect coding efficiency. We**  
12 **find that a convergent circuit with divergent parallel pathways can**  
13 **encode more information with nonlinear subunits than with linear**  
14 **subunits, despite the compressive loss induced by the convergence**  
15 **and the nonlinearities when considered individually. These results**  
16 **show that the combination of selective nonlinearities and a conver-**  
17 **gent architecture - both elements that reduce information when act-**  
18 **ing separately - can promote efficient coding.**

Neural computation | Efficient Coding | Retina | Sensory Processing | Information Theory

1 **S**ensory systems, by necessity, compress a wealth of infor-  
2 mation gathered by receptors into the smaller amount of  
3 information needed to guide behavior. In many systems, this  
4 compression occurs via common circuit motifs - namely con-  
5 vergence of multiple inputs to a single neuron and divergence  
6 of inputs to multiple parallel pathways (1). Selective nonlinear  
7 circuit elements transform inputs, selecting some parts of the  
8 signal while discarding others. Here we investigate how these  
9 motifs work together to determine how much information is  
10 retained in compressive neural circuits.

11 These issues are highly relevant to signaling in the retina,  
12 because the bottleneck produced by the optic nerve ensures  
13 that considerable feedforward convergence occurs prior to the  
14 transmission of signals to central targets. This convergence  
15 reduces the dimension of signals as they traverse the retina.  
16 In total, signals from ~ 100 million photoreceptors modulate  
17 the output of ~ 1 million ganglion cells (2, 3). If the dynamic  
18 range of the ganglion cell is not sufficiently expanded beyond  
19 that of the photoreceptors and bipolar cells, this convergent  
20 circuit architecture could lead to a compression of input signals  
21 in which some information or stimulus resolution is lost -  
22 resulting in ambiguously encoded stimuli. It is estimated  
23 that the population of ganglion cells collectively transmits  
24 approximately  $10^6$  bits of information (3–5) and that this is  
25 much less than the amount of information available to the  
26 photoreceptors (2). However, not much is known about how  
27 neuron properties interact with a convergent circuit structure  
28 to drive or mitigate a loss of information.

29 Receptive field subunits are a key feature of the retina's  
30 convergent circuitry. Multiple bipolar cells converge onto

a single ganglion cell - forming functional subunits within  
the receptive field of the ganglion cell (6, 7). Ganglion cell  
responses can often be modeled as a linear sum of a population  
of nonlinear subunits. These subunit models have been used to  
investigate center-surround interactions (8–12) and to explain  
the nonlinear integration of signals across space (7, 10, 13–15).

While it is clear that subunits have the potential to com-  
press inputs, it is not known whether this architecture sub-  
serves an efficient code where inputs are encoded with minimal  
ambiguity. For decades, information theory (16, 17) has been  
used to quantify the amount of information that neurons en-  
code (3, 5, 18–27). The efficient coding hypothesis proposes  
that the distribution of neural responses should be one that  
is maximally informative about the inputs (21, 22, 28). Take  
the example of a stimulus variable, such as luminance, where  
the brightness level is encoded by the number of spikes in the  
response. An input/output mapping in which most of the  
possible luminance levels are encoded by the same response  
(i.e. the same number of spikes or firing rate) makes many  
bright and dim inputs ambiguous and provides very little  
information.

Information can be maximized at the level of a single neu-  
ron by distributing the responses such that they optimally  
disambiguate inputs (23). A nonlinear response function opti-  
mized for the distribution of inputs can make the most of the  
neuron's dynamic range. Adaptive rescaling of the response  
nonlinearity to changes in the input statistics can maintain

## Significance Statement

Computation in neural circuits relies on a common set of motifs, including divergence of common inputs to parallel pathways, convergence of multiple inputs to a single neuron, and nonlinearities that select some signals over others. Convergence and circuit nonlinearities, considered individually, can lead to a loss of information about inputs. Past work has detailed how optimized nonlinearities and circuit weights can maximize information, but here, we show that incorporating non-invertible nonlinearities into a circuit with divergence and convergence, can enhance encoded information despite the suboptimality of these components individually. This study extends a broad literature on efficient coding to convergent circuits. Our results suggest that neural circuits may preserve more information using suboptimal components than one might expect.

G.J.G. designed experiments, implemented models, performed simulations, wrote manuscript. F.R. and E.T.S.B. conceived experiments, wrote manuscript.

No conflict of interest.

<sup>1</sup>F.R. (Fred Rieke) and E.T.S.B. (Eric T. Shea-Brown) contributed equally to this work as senior co-authors.

<sup>2</sup>To whom correspondence should be addressed. E-mail: ellag9uw.edu

58 maximal information in the output (29–31). Alternatively, information  
 59 information can be maximized by optimizing connection weights  
 60 in the circuit, perhaps in combination with optimizing the  
 61 nonlinearities (19, 32, 33). These past works, however, have  
 62 not made explicit how the set of motifs found in most neural  
 63 circuits, and in the retina in particular, combine to collectively  
 64 influence coding efficiency.

65 Our contribution here is to dissect a canonical neural circuit  
 66 in silico, and to investigate how much each of its components  
 67 contribute to or detract from the information encoded by the  
 68 circuit about stimuli. These circuit components, considered  
 69 individually, have the potential to discard information. We  
 70 begin with the simplest motif of converging inputs to single  
 71 neurons, and analyze the role of rectifying nonlinear subunits  
 72 applied to each of these multiple inputs. We then add a  
 73 diverging motif which splits the response into two opposing  
 74 pathways. We find that rectifying nonlinear subunits mitigate  
 75 the loss of information from convergence when compared to  
 76 circuits with linear subunits. This is despite the fact that  
 77 the rectifying nonlinear subunits, considered in isolation, lead  
 78 to a loss of information. Moreover, this ability of nonlinear  
 79 subunits to retain information stems from a reformatting of  
 80 the inputs to encode distinct stimulus features compared with  
 81 their linear counterparts. Our study contributes to a better  
 82 understanding of how biologically-inspired circuit structures  
 83 and neuron properties combine to impact coding efficiency in  
 84 neural circuits.

## 85 Results

86 We start by quantifying the effect of common circuit motifs,  
 87 alone and in combination, on coding efficiency. We then  
 88 explore, geometrically, how nonlinear subunits shape the  
 89 response distribution to gain intuition as to how they can lead  
 90 circuits to retain more information. Finally, we explore the  
 91 implications of nonlinear subunits for encoding stimulus  
 92 properties. To emphasize the geometrical characterization of  
 93 the encoding, we use an abstract circuit model without  
 94 temporal dynamics.

95 **Common circuit components are lossy or inefficient.** Our goal  
 96 is to understand how the combination of divergence of inputs  
 97 and convergence of nonlinear subunits impacts the retina's  
 98 ability to efficiently encode spatial inputs. We are particularly  
 99 interested in the impact of selective nonlinearities on  
 100 efficient coding. We use Shannon's information to describe  
 101 the maximum amount of information that a distribution of  
 102 responses could contain about its inputs (16, 34). We consider  
 103 deterministic circuits in which the mutual information between  
 104 the stimulus and response reduces to the entropy of the  
 105 response. Specifically, we use discrete entropy to compare the  
 106 information content of continuous distributions of responses  
 107 generated by different model circuits. We also confirm our  
 108 results by computing the mutual information of noisy circuit  
 109 responses (see SI Appendix). The parameters of the discretization  
 110 were chosen so that the difference between the area under  
 111 the discretized distribution and its continuous counterpart was  
 112 minimized for a range of distinct distributions (see Methods).

113 Many neural circuits are organized in layers of converging  
 114 and diverging neurons and connections. In the retina (Fig.  
 115 1A), this produces a compression and "re-formatting" of a  
 116 high-dimensional visual input into a lower dimensional neural code

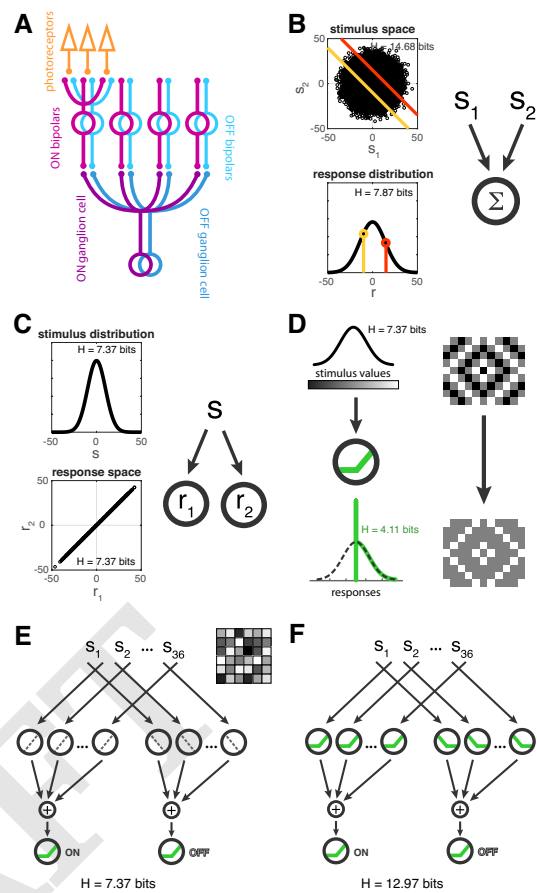

117 **Fig. 1.** Neural circuits are composed of inherently lossy components. (A) Schematic  
 118 of retina circuit with its convergent and divergent structure. (B) Converging two inputs  
 119 results in ambiguities. A 2-input stimulus space is reduced to a single output response  
 120 space in which one response (bottom: yellow and orange points) represents all stimuli  
 121 along an isoline (top: yellow and orange lines) where  $s_1 + s_2 = \text{constant}$ . All  
 122 entropy values shown are based on a discrete entropy computation (see Methods).  
 123 (C) Diverging a signal to two outputs can produce redundancies. (D) Nonlinear  
 124 transformation of a Gaussian distributed stimulus input with a ReLU (rectified linear  
 125 unit) can distort the distribution, producing a compressed response in which some  
 126 portion of the stimulus information is discarded. (E-F) Convergent, divergent circuits  
 127 with (E) linear subunits, or (F) nonlinear subunits. Subunit responses are weighted by  
 128  $1/\sqrt{36}$ . Example stimulus image is shown.

117 that can be interpreted by the brain. In addition, nonlinear  
 118 responses abound in the neurons that compose these layers.  
 119 These mechanisms may complicate the ability of the circuit to  
 120 retain information. For example, two converging inputs can  
 121 result in ambiguities. With linear convergence, the ability to  
 122 distinguish the stimulus combinations that sum to the same  
 123 value is lost and hence this is a form of lossy compression  
 124 (Fig. 1B). The entropy of the full two-input stimulus (Fig. 1B,  
 125 top) is 14.68 bits - meaning that a given point in the stimulus  
 126 space provides 14.68 bits of information about the identity  
 127 of the stimulus (given our choice of bin size, see Methods).  
 128 The entropy of the convergent response is smaller (7.87 bits;  
 129 Fig. 1B, bottom), thus indicating ambiguity in the stimulus  
 130 identity.

131 Diverging motifs are another common neural circuit  
 132 construction. In the example shown in Figure 1C, the divergent  
 133 responses are identical and the entropy of the 2-dimensional  
 134 response space ( $H = 7.37$  bits) is the same as the entropy  
 135 of the 1-dimensional stimulus distribution shown in the top

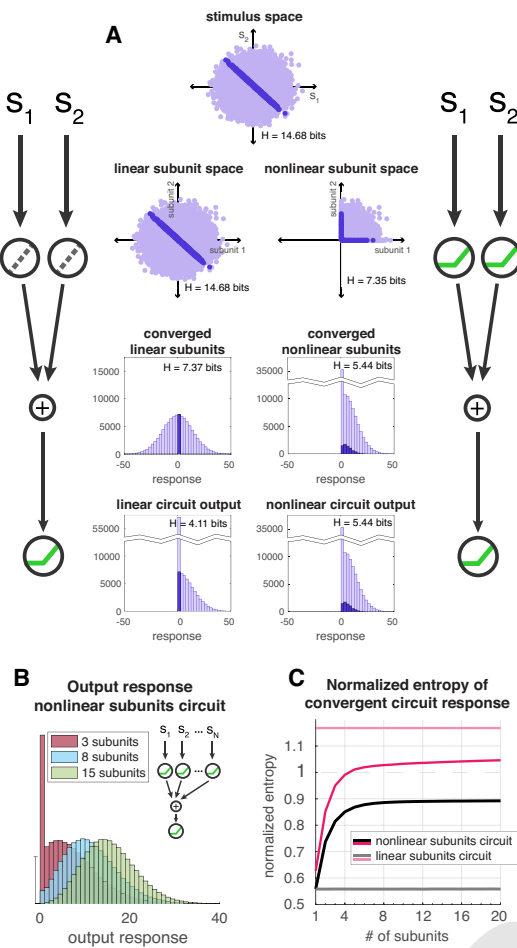

**Fig. 2.** (A) The encoding of the stimulus space (top) within each layer of a 2-subunit convergent circuit configuration without divergence. Subunits (2nd row); summed subunits response distribution (3rd row); nonlinear output response distribution (4th row). Left, linear subunits circuit; right, nonlinear subunits circuit. The output nonlinearity does not have an additional effect on the summed nonlinear subunits without noise. (B) Histograms of the output response for the NSC are shown for configurations with 3, 8, and 15 subunits. The subunit responses are normalized so that each subunit is weighted by  $1/\sqrt{N}$  where  $N$  is the number of subunits. The inputs  $[s_1, s_2, \dots, s_N]$  are independently drawn from a gaussian distribution (see Methods). (C) Normalized entropy of output response as a function of number of convergent subunits where subunits are normalized as in B and the circuit entropy is normalized by the entropy of the summed linear subunits (see Methods). Black curve, NSC; gray, LSC; dark pink, nonlinear subunits with optimized sigmoidal output nonlinearity; light pink, linear subunits with optimized sigmoidal output nonlinearity. Standard deviation of entropy over 10 runs for each configuration is on the order of between  $10^{-4}$  and  $10^{-2}$  bits.

we interpret the output nonlinearities as occurring in spike generation.

Similarly to convergence, nonlinear transformations can lead to loss of information by introducing ambiguities. Take the example of a rectified-linear transformation that is thresholded at zero and is therefore selective for positive inputs (Fig. 1D). It is a non-invertible nonlinearity where half of the stimulus distribution is encoded faithfully and half is mapped to an output of 0 by the thresholded response. Therefore, this nonlinearity induces lossy compression: the information that would distinguish these thresholded stimuli has been irretrievably discarded. Correspondingly, the entropy of the rectifying nonlinear response ( $H = 4.11$  bits) is around half of that for the stimulus distribution ( $H = 7.37$  bits).

Each of the common circuit motifs described above is inefficient or discards information when considered in isolation (Figs. 1A-D). How much information can a neural circuit with all of these components retain? We constructed a model circuit that compresses a high-dimensional spatial input into a low-dimensional output. It has an  $N$ -dimensional input structure that diverges along two pathways, an ON and an OFF pathway, each culminating in a single output neuron. The inputs to each output neuron come from a layer of subunits - the building blocks for the receptive field structure of the output neuron. Each subunit receives input from one of the  $N$  stimulus inputs that compose a stimulus image, and each stimulus input is independently drawn from a gaussian distribution. Within each pathway, the normalized subunit responses linearly sum at the output neuron and are then rectified.

The ON and OFF output responses lie in a 2-dimensional space, and form a low-dimensional representation of the  $N$ -dimensional input. We compute the entropy of the 2-dimensional output response after showing many stimulus samples to the circuit. In our study, circuits have rectifying output neurons which model the rectifying responses of ganglion cells. We wanted to know whether the subunits - which represent non-spiking bipolar cells - reduce or enhance the information encoded by the circuit when their responses are also rectifying compared to when subunit responses are linear. For a 36-dimensional input space, the circuit with linear subunits (LSC: linear subunits circuit) has 7.37 bits of entropy (Fig. 1E), while the circuit with nonlinear subunits (NSC: nonlinear subunits circuit) has 12.87 bits of entropy (Fig. 1F). The greater entropy of the NSC is counterintuitive because the nonlinear neurons considered in isolation lead to a loss of information (Fig. 1D).

This unexpected result motivated us to consider how each circuit component interacts with the others to determine the encoded information. Our claim is that nonlinear subunits, together with nonlinear output neurons, retain more information than linear subunits together with nonlinear output neurons. This necessarily differs from a claim that the NSC produces more information than what is available in the stimulus, as no processing operation can increase the information content of an input signal (Data Processing Inequality, 17). Neither circuit in Figure 1E,F retains the full amount of information in the 36-dimensional input signal which has a much higher entropy ( $H = 265.28$  bits, see Methods) than the 2-dimensional outputs produced by either circuit. The convergence of the inputs necessarily limits the information in the output (17).

plot ( $H = 7.37$  bits). This demonstrates that divergence of an input into two neurons may produce an inefficient neural architecture by producing redundant or correlated signals.

Nonlinearities are abundant in neural circuits, and firing rates generally have a nonlinear relationship to inputs. On a more granular level, synaptic and spike generation mechanisms are often nonlinear and can be approximated by thresholded functions. The rectified linear nonlinearity is a tractable representation that captures key features of neural nonlinearities, including the selectivity for some inputs over others. The subunits in our model most closely represent bipolar cells, and we interpret the subunit nonlinearities as the relationship between input and excitatory synaptic output. The output units in our model most closely represent ganglion cells, and

211 To illustrate, the population of ON linear subunits contains  
212 the same amount of information as the stimulus; however,  
213 that information will be reduced as soon as the subunits are  
214 summed. The rectification that follows the summation will  
215 further reduce the encoded information. In contrast, at the  
216 level of the population of nonlinear subunits, the encoded  
217 information will be reduced early on by the rectifying subunits.  
218 The same summation and output rectification follows, and  
219 the net result is that there is less information lost in the final  
220 output. This advantage is due to nonlinear processing at the  
221 subunit level.

222 Our study concerns the reformatting of stimulus information  
223 by nonlinear subunits. We chose nonlinearities that are  
224 inherently selective for parts of the stimulus inputs (i.e. ON,  
225 OFF rectification) as a generic model for the selectivities in  
226 bipolar cells. As discussed above, such selective nonlinearities  
227 discard information at the single neuron level. Rather  
228 than optimizing circuit weights or input biases to maximize  
229 information, our goal is to explore the contribution of generic,  
230 fixed nonlinearities that operate independently on signals in  
231 each subunit within a parallel circuit. We next investigate  
232 how convergence interacts with these subunit nonlinearities.

233 **Lossy nonlinear subunits benefit from convergence.** To under-  
234 stand the joint impact of nonlinear subunits and conver-  
235 gent connectivity on encoded information, we examined circuit  
236 configurations with a single pathway, i.e. without divergence  
237 (Fig. 2). Pathways with two subunits permit visualization of  
238 the input and response spaces. Stimuli that sum to the same  
239 value (example highlighted with dark purple in the top plot  
240 of Fig. 2A) elicit the same response in the circuit pathway  
241 with linear subunits because the subunits do not transform  
242 the inputs (Fig. 2A, left, 3rd and 4th rows). The nonlinear  
243 subunits transform the stimulus space such that all points  
244 are compressed into a single quadrant (Fig. 2A right, 2nd  
245 row). Summing the nonlinear subunits (Fig. 2A, right, 3rd  
246 row) allows the potentially ambiguous stimuli to have a more  
247 distributed representation in the output response - meaning  
248 that they are represented more distinctly by the nonlinear  
249 subunits pathway than the pathway with linear subunits.

250 For a configuration with a single subunit, the LSC and  
251 NSC would have identical output responses so long as there re-  
252 mained an output nonlinearity. The 2-subunit circuit (Figure  
253 2A) showed improved information transmission with nonlinear  
254 subunits over linear subunits, and this prompted us to ask  
255 whether there would be a continued improvement with addi-  
256 tional nonlinear subunits. We computed the entropy of the  
257 output responses for the linear and nonlinear subunit configu-  
258 rations that converge to a single output for a range of subunit  
259 quantities (Fig. 2B,C; also see SI Appendix, Fig. S1A). With  
260 increasing numbers of subunits, more subunit responses are  
261 converged into the output response. To observe a relative  
262 change in entropy as the number of subunits is increased, the  
263 subunits were normalized; and to observe the dependence of  
264 this effect on the nonlinearities, the output response entropy  
265 was normalized by the entropy of the summed linear subunits  
266 (see Methods).

267 The distribution of output responses for the nonlinear sub-  
268 units pathway qualitatively changes with the number of sub-  
269 units (Fig. 2B). With few subunits, the output response  
270 distribution resembles the truncated gaussian seen for the rec-  
271 tified output response in Figures 1D and 2A. With increasing

272 numbers of subunits, the output response distribution approx-  
273 imates a gaussian (due to the central limit theorem) with a  
274 mean that shifts towards more positive values (Fig. 2B; also  
275 see SI Appendix, Fig. S2).

276 The entropy for the nonlinear subunits pathway increases  
277 with increasing subunit dimension (Fig. 2C, black line). It  
278 saturates near a normalized value of 0.9, before ever reaching  
279 the entropy of the converged linear subunits (where normalized  
280 entropy is 1); thus, although increasing convergence improves  
281 the information retention of nonlinear subunits, the entropy  
282 of the converged nonlinear subunits is apparently bounded by  
283 the entropy of the converged linear subunits. The nonlinear  
284 subunits only encode positive inputs whereas the linear sub-  
285 units encode positive and negative inputs. However, when the  
286 summation of the linear subunits is followed by a nonlinear  
287 rectification at the output, the response entropy is reduced  
288 ( $H = 4.11$  bits, Fig. 2C, grey line, normalized  $H = 0.56$ ) and  
289 does not increase beyond that regardless of the number of  
290 convergent subunits.

291 The output nonlinearity reduces the entropy of the LSC  
292 whereas in the NSC the output nonlinearity does not im-  
293 pact the entropy of the summed nonlinear subunits since the  
294 responses have already been rectified. The summed linear  
295 subunits produce a gaussian distribution, and the summed  
296 nonlinear subunits approach a gaussian distribution as greater  
297 numbers of subunits are converged. The entropy of either  
298 circuit could be maximized by replacing the output nonlin-  
299 earity with a sigmoidal nonlinearity that is the cumulative  
300 gaussian of the summed subunits distribution bounded by the  
301 maximum and minimum values of that distribution (23, see  
302 Methods). Doing so benefits the linear subunits motif more  
303 than the rectified subunits motif (compare dark and light pink  
304 curves, Fig. 2C; and in SI Appendix, Fig. S1A) because the  
305 variance of the full distribution of summed linear subunits is  
306 greater than that for the distribution of summed nonlinear  
307 subunits.

308 Figure 2 illustrates how the placement of the rectified non-  
309 linearity within the circuit impacts the entropy of the response.  
310 When the nonlinearity is placed within the subunits, less in-  
311 formation is lost than when the nonlinearity is shifted further  
312 down in the circuit after the summation of linear subunits.  
313 These results continue to hold for the mutual information  
314 between the output response and the stimulus when noise is  
315 added after the subunit summation (SI Appendix, Fig. S1).  
316 We wondered whether this effect of nonlinear convergence was  
317 sufficient to explain why the divergent NSC in Figure 1F has  
318 higher entropy than the divergent LSC (Fig. 1E). We next  
319 explore the impact of divergence on information coding with  
320 nonlinear subunits.

321 **Divergent circuit structure leverages selectivity of nonlinear**  
322 **subunits.** To understand the combined impact of divergence,  
323 convergence, and nonlinearities, we present a geometrical ex-  
324 ploration of the transformations that take place in the different  
325 layers of the circuit with either linear or nonlinear subunits.  
326 Our demonstration uses circuits with two input dimensions  
327 to facilitate visualization of the stimulus and subunit spaces  
328 (Fig. 3).

329 To determine the optimal nonlinear thresholds, we swept  
330 through a range of thresholds for ON and OFF subunits in a  
331 divergent, convergent circuit with two inputs and computed  
332 the response entropy for each combination of threshold values.

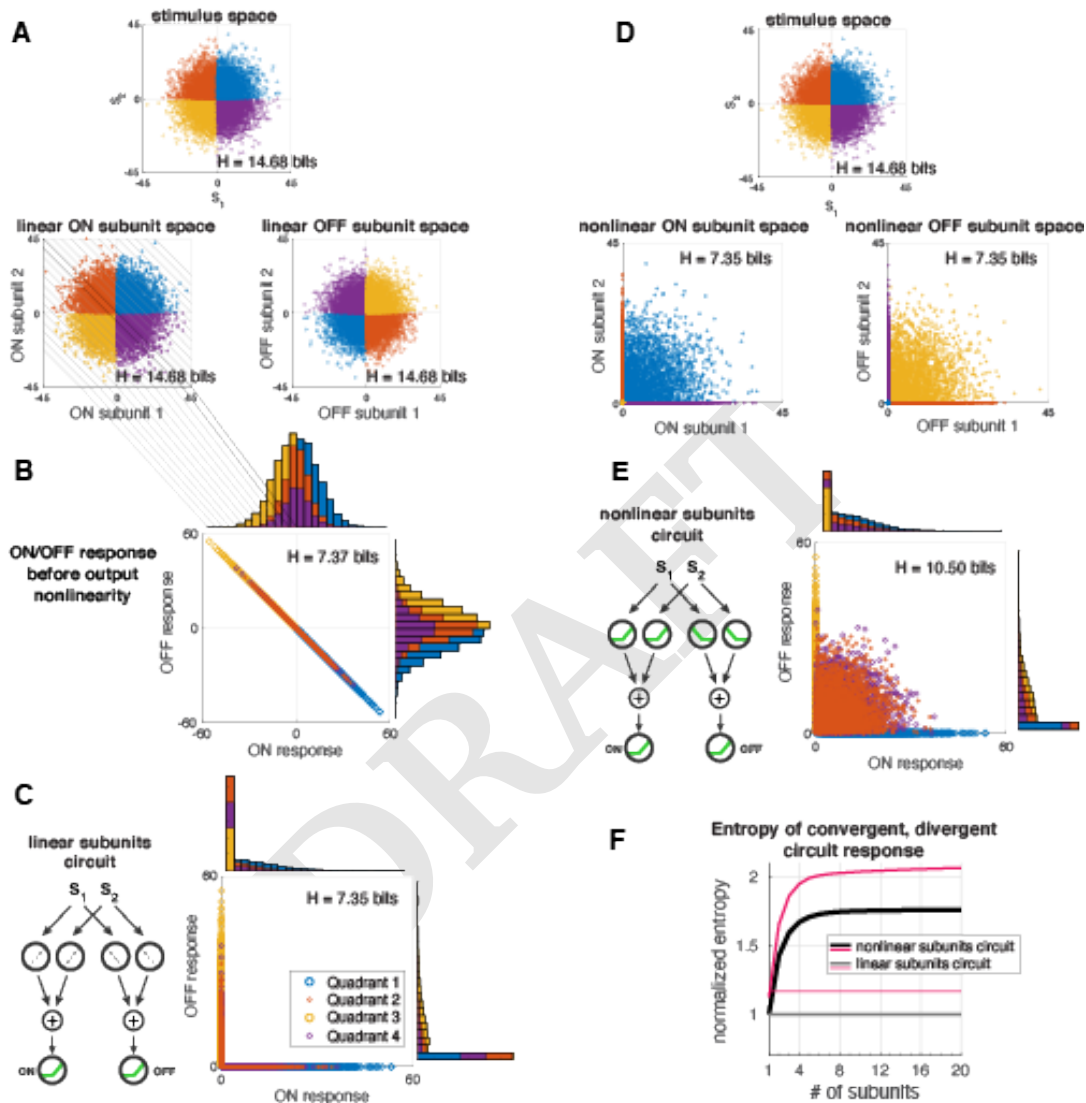

**Fig. 3.** Visualization of stimulus and response mappings at each level of a convergent, divergent circuit with two inputs, two subunits for each pathway (ON and OFF pathways), and a nonlinear output neuron for each pathway. The points in all subsequent plots are color-coded by the stimulus quadrant from which they originate. (A) The stimulus space (top) has color-coded quadrants. The 2-input stimulus space maps onto a 2D linear subunit space for each pathway (second row, left: ON; right: OFF). The subunit spaces are shown before subunit normalization. (B) The response space is shown for the linear sum of subunits before the output nonlinearity is applied and (C) after the nonlinear output response. (D) The 2-input stimulus space (top) maps onto a 2D **nonlinear** subunit space for each pathway (second row, left: ON; right: OFF). (E) The output response space for the NSC. Note that the output response before the output nonlinearity is applied (not shown) is identical to the output response after the output nonlinearity is applied for the circuit with nonlinear subunits. (F) Normalized entropy of the output response for convergent, divergent circuits with increasing input and subunit dimension (subunit responses are normalized as before). The circuit entropy is normalized by the entropy of the summed linear subunits. Gray, LSC in C; black, NSC in E; light pink, LSC with optimal sigmoidal output nonlinearity; dark pink, NSC with optimal sigmoidal output nonlinearity.

333 Very low thresholds approximate linear functions while high  
334 thresholds are extremely rectifying. We found that the optimal  
335 combination of ON and OFF subunit thresholds meet at zero  
336 (SI Appendix, Fig. S3). These zero-crossing nonlinearities  
337 are used for all other figures in the main text. Furthermore,  
338 when output responses are considered abstractly as static firing  
339 rates, this position of thresholds produces low mean output  
340 responses that are comparable to those from the most rectified  
341 subunits (SI Appendix, Fig. S2 and S4).

342 As before, the linear ON subunit space (Fig. 3A, 2nd row,  
343 left) is identical to the stimulus space (Fig. 3A, top) because  
344 no transformation or compression has taken place through the  
345 linear subunits. The OFF subunits receive a negative copy of  
346 the same stimulus that the ON subunits receive which reflects  
347 the stimuli about the diagonal (Fig. 3A, 2nd row, right).  
348 When the linear subunits converge within their respective  
349 pathways, the ON and OFF responses are compressed onto a  
350 diagonal line because they are anti-correlated (Fig. 3B). This  
351 emphasizes the fact that the ON and OFF linear subunits do  
352 not have stimulus selectivities in the strictest sense. When  
353 the output nonlinearities are applied, this linear manifold is  
354 folded into an L-shape (Fig. 3C).

355 The entropy for the output response of the LSC with di-  
356 verging pathways ( $H = 7.35$  bits) is higher than it was with  
357 just a single pathway ( $H = 4.11$  bits, Fig. 2A). However, it  
358 is only increased enough to nearly match the entropy of a  
359 single pathway response without any nonlinearities in either  
360 the subunits or the output ( $H = 7.37$  bits). In other words, the  
361 OFF pathway in the LSC with output nonlinearities (Fig. 3C)  
362 encodes the information discarded by the output nonlinearity  
363 in the ON pathway, but it does not enable the divergent LSC  
364 in Figure 3C to do any better than the convergence of only  
365 ON linear subunits (Fig. 2A). This is because the linear sub-  
366 units do not select for anything specific and nothing is lost to  
367 selectivity; instead the loss of entropy (relative to the entropy  
368 of the stimuli) occurs from convergence. Furthermore, when  
369 the convergence of the ON linear subunits is followed by a  
370 nonlinearity, only the positive-summing stimuli are selected. A  
371 divergent OFF pathway selects the negative-summing stimuli  
372 that the ON pathway discards. Visually, one can see that  
373 nothing is lost by folding the linear response space into an  
374 L. The divergent LSC recovers what is lost by the output  
375 nonlinearities, but not what is lost by convergence.

376 Unlike the linear subunits, the stimulus undergoes a trans-  
377 formation within the nonlinear subunits layer (Fig. 3D), pro-  
378 ducing a complimentary compression for the ON and OFF  
379 pathways. When these subunits converge in their respective  
380 pathways (Fig. 3E), the output response has some similarities  
381 to that for the LSC (Fig. 3C). The L-shaped manifold is still  
382 present, but the points representing the stimulus inputs with  
383 mixed sign have been projected off it. By virtue of having  
384 these points leave the manifold and fill out the response space,  
385 entropy is increased. In fact, as more nonlinear subunits con-  
386 verge in a divergent circuit, a greater portion of points are  
387 projected off the manifold along the axes, and as a result  
388 the entropy continues to increase until saturation (Fig. 3F,  
389 black curve). These results continue to hold for the mutual  
390 information between the output response and the stimulus  
391 when independent noise is added to the subunit summation  
392 in each pathway (SI Appendix, Fig. S1B).

393 The NSC does nothing to save the dually positive (blue

394 quadrant) or dually negative (yellow quadrant) stimuli from  
395 information loss by convergence. Those are ultimately en-  
396 coded in the same way as by the LSC. In fact, the circuit  
397 entropy is less sensitive to the subunit thresholds when the  
398 stimuli corresponding to different subunits are correlated (i.e.  
399 between  $s_1$  and  $s_2$ ) than when the stimuli are anti-correlated  
400 (SI Appendix, Fig. S5). The advantage conferred by the diver-  
401 gent nonlinear subunits is to preserve the variance among the  
402 mixed sign stimuli, not only within a single pathway, but also  
403 across ON and OFF pathways (this is why adding a bias to  
404 the summed linear subunits to evade the output nonlinearity  
405 will not match or surpass the entropy of the NSC). As the  
406 stimulus dimension is increased, the mixed sign stimuli make  
407 up a larger and larger proportion of all stimuli, resulting in  
408 the increasing advantage of the NSC and its saturation.

409 To show that the nonlinear subunits themselves confer a  
410 unique advantage, we once again replace the output nonlin-  
411 earities with optimal sigmoidal nonlinearities that are the  
412 cumulative gaussian of the summed subunit distribution. The  
413 entropy of the LSC is increased (Fig. 3F, light pink), how-  
414 ever, it is not increased beyond the entropy of the NSC with  
415 (Fig. 3F, dark pink) or without (Fig. 3F, black) optimal  
416 output nonlinearities. This demonstrates that the entropy  
417 of the convergent, divergent circuit can be increased beyond  
418 an optimization of the output nonlinearities by implementing  
419 selective nonlinear subunits.

420 The rectified output nonlinearities have the effect of decorre-  
421 lating the ON and OFF output responses in the LSC, while for  
422 the NSC, it is the nonlinear subunits themselves that decor-  
423 relate the output responses (correlation coefficients: linear  
424 response = -1, Fig. 3B; LSC = -0.4670, Fig. 3C; NSC =  
425 -0.4669, Fig. 3E). Indeed, although the output nonlinearity  
426 decorrelates the ON and OFF outputs of the LSC, this decor-  
427 relation does not produce any gains in entropy relative to the  
428 LSC before output nonlinearities are applied. Furthermore,  
429 the ON and OFF responses of the NSC are as decorrelated as  
430 for the LSC, but unlike the LSC, it experiences an entropy gain  
431 over the converged linear subunits alone. Complementing the  
432 geometrical explanations above, SI Appendix II presents an  
433 analytic argument for why the NSC has greater entropy than  
434 the LSC using the fact that the summed subunit distributions  
435 in both circuits are gaussian in the limit of large  $N$  subunits.

436 The additional entropy conferred by divergence for the  
437 NSC is due to *how* the nonlinear subunits decorrelate the  
438 ON and OFF pathways, and not merely the fact that those  
439 pathways have been decorrelated. It is this subunit processing  
440 step that pulls responses off the linear manifold in the output  
441 response space leading to an increase in response entropy. The  
442 space of the responses in the linear case can be expanded by  
443 manipulating the linear subunit weights; however, we find that  
444 no rotation of the linear subunit weights can cause the entropy  
445 of the LSC to surpass that of the NSC (SI Appendix, Figs.  
446 S6 and S7). Furthermore, decorrelating the nonlinear subunit  
447 weights confers limited benefit relative to decorrelating the  
448 linear subunit weights (SI Appendix, Fig. S8).

449 To determine whether the increase in entropy for the NSC is  
450 due to a “synergistic” effect whereby the ON and OFF output  
451 responses convey more information together than the sum of  
452 the information that each output contains individually (3, 35,  
453 36), we computed the synergy ( $syn(R_1, R_2) = I(S; R_1, R_2) -$   
454  $I(S; R_1) - I(S; R_2)$ ) for the different circuit configurations

455 and for a range of subunit quantities (SI Appendix, Fig. S9).  
456 Positive values of this metric indicate synergy while negative  
457 values indicate redundancy. None of the circuits have synergy;  
458 however, the NSC has less redundancy than the LSC.

459 Increased response entropy could reflect an increased precision  
460 in encoding the same stimulus features or the encoding of  
461 new stimulus features. We next explore how the processing of  
462 mixed sign stimuli by nonlinear subunits creates sensitivity to  
463 stimulus features that are not encoded with linear subunits.

464 **Nonlinear subunits circuit encodes both mean and contrast**  
465 **information.** To determine whether the boosted entropy of the  
466 NSC accompanies an encoding of additional stimulus features,  
467 we visualized the stimulus and response spaces for the linear  
468 and nonlinear circuit configurations. The stimulus inputs are  
469 assumed to represent luminance values and the distributions  
470 are the same as before. We chose two basic features of visual  
471 stimuli to investigate: mean luminance and contrast. In Figure  
472 4A, the stimulus space is color-coded by bands of mean  
473 luminance levels. In the response spaces for the LSC and NSC  
474 a banded structure is preserved (Fig. 4A), indicating that  
475 there is a separation of the mean luminance levels within the  
476 response spaces for both circuits.

477 Contrast is encoded differently the two circuits (Fig. 4B).  
478 The stimulus space in Figure 4B (left) is color-coded for three  
479 contrast levels. The highest contrast areas of the space are  
480 in the mixed sign quadrants. The representations for low,  
481 medium, and high contrast stimuli overlap each other in the  
482 output response space of the LSC (Fig. 4B, middle). However,  
483 there is separation of these contrast levels in the output  
484 response space of the NSC (Fig. 4B, right). As the number  
485 of inputs increase, so too does the proportion of mixed sign  
486 inputs, giving the NSC a continued advantage in encoding  
487 contrast over the LSC as more subunits are converged. This  
488 is reinforced by the result that the NSC is more sensitive to  
489 anti-correlated stimuli than the LSC (SI Appendix, Fig. S5,  
490 right panel). Thus, the NSC encodes both mean and contrast  
491 information whereas the LSC only encodes mean luminance.

## 492 Discussion

493 In a circuit like the retina, inputs diverge to distinct cell types  
494 while neurons receive converging inputs from many presynaptic  
495 neurons. This combination of divergence and convergence  
496 reorganizes and compresses visual inputs. To determine the  
497 impact of these common circuit properties on information  
498 encoding, we built a circuit model and compared the response  
499 entropies of linear and nonlinear subunit configurations. Divergence,  
500 convergence, and non-invertible nonlinear signal  
501 transformations each have a negative impact on efficiency, or  
502 information, individually. However, when arranged together  
503 they can mitigate the loss of information that is imposed by  
504 the reduction in dimension from inputs to outputs.

505 The advance made by our study is to demonstrate that  
506 rectified nonlinearities can increase the response entropy in  
507 a circuit with convergence and divergence, not merely by  
508 decorrelating inputs, but by re-coding them. We predict that  
509 the information encoded by neurons is maximized by circuit  
510 mechanisms that exploit such nonlinearities before inputs  
511 converge. This complements known mechanisms, such as  
512 adaptation and response equalization, that enhance coding  
513 efficiency by providing a good match between input stimuli

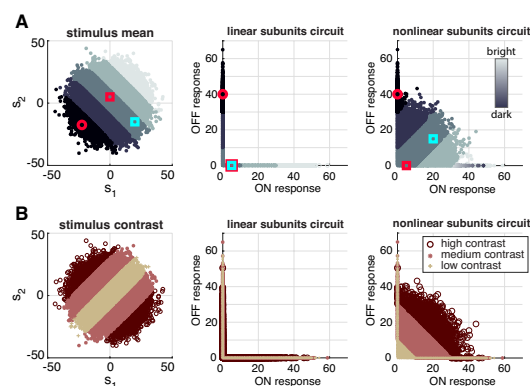

514 **Fig. 4.** Mean and contrast encoding of convergent, divergent circuits from Figure 3  
(2 inputs, ON and OFF outputs). (A) Visualization of the stimulus mean and output  
515 response spaces. For example, the bright mean stimulus band contains the 2-input  
516 image samples that have the highest mean luminance. The red square is an arbitrary  
517 reference point. In the stimulus space, the cyan square has the same mean luminance  
518 as the red square but a different contrast, while the red circle has the same contrast  
519 as the red square but a different mean luminance. (B) Visualization of the stimulus  
520 contrast and output response spaces. The high contrast stimulus bands contain 2-  
521 input image samples that have high contrast, whereas the low contrast band contains  
522 2-input image samples where the input luminance is more correlated.

523 and responses at the level of the output neuron (23, 30–32, 37).

## 524 Transforming convergent inputs enhances circuit efficiency.

525 For a single neuron receiving a single input with a known  
526 distribution, classical and influential studies prescribe how  
527 transmitted information can be maximized by matching the  
528 response function to that distribution (23, 30, 31). We consider  
529 a complementary question here: when there are multiple  
530 inputs converging to a neuron, how should those inputs be  
531 transformed to maximize the information that a neuron – or  
532 that multiple neurons within a divergent output population –  
533 can transmit?

534 The weights with which inputs are combined is often a key  
535 factor in the information encoded by a circuit and this issue  
536 has been studied extensively (19, 33). Here, we highlight an  
537 alternative factor: selective “subunit” transformations that  
538 are applied to each input separately before they are combined.  
539 We chose non-invertible nonlinearities that exhibit generic  
540 selectivity (ON or OFF) and that, individually, induce lossy  
541 compression of stimuli with no inherent spatial statistical  
542 redundancy to exploit. Despite these properties, we found  
543 that a circuit with convergent, divergent architecture encoded  
544 more information with rectified subunit nonlinearities than  
545 with linear subunits.

546 This increase comes from a reformatting of the stimulus  
547 distribution in a manner that reduces the ambiguities produced  
548 by the convergence of multiple inputs (Fig. 2). In the LSC,  
549 it was possible to spread out the circuit responses by tuning  
550 the subunit weights (SI Appendix, Fig. S6) such that the  
551 ON subunits could be made independent of the OFF subunits.  
552 After applying the output nonlinearities, the response space  
553 for the LSC resembles that for the NSC. However, the entropy  
554 for the LSC still does not surpass that of the NSC (see SI  
555 Appendix, Figs. S6 and S7) because it does not reformat the  
556 mixed sign inputs as the NSC does (SI Appendix, Fig. S6).  
557 This reformatting facilitates the encoding of multiple stimulus  
558 features (mean luminance and contrast) in Figure 4. Thus,  
559 in the circuits we study here, efficient coding can be achieved

551 with non-invertible nonlinear components. We note that even  
552 invertible nonlinearities, when followed by noise, will become  
553 difficult to invert and may thus behave like a non-invertible  
554 nonlinearity.

555 **Redundancy, correlation, and information.** We find that the  
556 efficiency of divergent circuits can be enhanced by nonlin-  
557 earities that decorrelate the outputs, as others have found  
558 (32, 38). Indeed, our findings show that diverging ON and  
559 OFF pathways resulted in efficiency gains for both the linear  
560 and nonlinear subunits circuits (compare the entropies for  
561 the single pathway configurations in Figure 2C to those for  
562 the corresponding divergent circuits in Figure 3F). Nonlinear  
563 responses in ganglion cells have more of an effect on decor-  
564 relating their responses than their center-surround receptive  
565 field properties (39). However, as pointed out in (39), weak  
566 correlation is not necessarily weak dependence. In the diver-  
567 gent, convergent circuits in Figure 3, rectifying nonlinearities  
568 located either in the output neurons or in the subunits decor-  
569 relate the outputs to a similar extent. However, a circuit with  
570 subunit nonlinearities produces the greater increase in entropy  
571 relative to a summation of linear subunits.

572 Maximizing information is often seen as equivalent to reduc-  
573 ing redundancy (25, 28, 35, 40, 41). The responses from the  
574 NSC in Figure 3 have more information than those from the  
575 LSC and less redundancy (SI Appendix, Fig. S9). This is true  
576 despite their having the same degree of correlation, indicating  
577 that the reduction in redundancy is due to nonlinear reshaping  
578 of response distributions. The neural code in the retina is  
579 highly redundant (3, 35), as the degree to which neighboring  
580 ganglion cells share information has been estimated as roughly  
581 ten-fold (40). Our results suggest that the level of redundancy  
582 can be tuned by the subunit nonlinearities.

583 The connectivity structure and connection weights also  
584 have a role in reformatting inputs as they pass through a  
585 circuit. Compressed Sensing is a coding paradigm that has  
586 been used to model olfactory circuits in particular (42). In  
587 the presence of a compressive bottleneck in a neural circuit,  
588 Compressed Sensing is characterized by optimal connection  
589 weights that are sparse. Specifically, the highest levels of  
590 mutual information (or signal entropy) are obtained in these  
591 circuits when many of the weights potentially connecting in-  
592 puts to neurons in the bottleneck are set to zero. Studies  
593 of Compressed Sensing with nonlinear units have related the  
594 parameters of such optimal sparse connectivity to observations  
595 and predictions in neural circuits (43, 44). One such study  
596 found that information was maximized by receptors that are  
597 uncorrelated and that selectively respond to half of the inputs  
598 (45). In SI Appendix Figure 8, we corroborate these findings  
599 and extend them to circuits with subunit nonlinearities. In  
600 a sparse, compressive circuit configuration, the inclusion of  
601 rectifying subunit nonlinearities leads to increases in encoded  
602 information relative to a sparse, compressive circuit with linear  
603 subunits. Here, we employed uniform weights with a wide  
604 range of sparsity levels, so as to highlight the contribution of  
605 the rectifying nonlinear subunits to the efficiency of the circuit  
606 responses in varied circuit architectures.

607 Bell and Sejnowski (19) showed that nonlinearities have  
608 the effect of reducing redundancy between output neurons  
609 by separating statistically independent parts of the inputs.  
610 Following that, it was shown that the efficient encoding of  
611 natural signals is facilitated by a nonlinear decomposition

612 whose implementation is similar to the nonlinear behaviors  
613 observed in neural circuits through divisive normalization (46).  
614 Our study contributes to this body of work by showing how  
615 a circuit with convergent, divergent structure can leverage  
616 nonlinear subunits to contribute to a more informative, com-  
617 pressed representation by reducing redundancy (SI Appendix  
618 Fig. S9) independent of their effect on correlations.

619 **Reconciling selectivity with efficiency.** Nonlinearities can have  
620 different functional consequences for neurons. Nonlinear trans-  
621 formations can induce selectivity in that they can cause a  
622 neuron to encode a very particular aspect of the stimulus  
623 or its inputs (47, 48). Nonlinearities can otherwise optimize  
624 efficiency by maximizing the entropy of the response distri-  
625 bution (23). The rectified nonlinearity that we used does  
626 not maximize the response entropy of the individual neuron  
627 that receives gaussian-distributed inputs, but it does enforce a  
628 strict selectivity for inputs above threshold. Selectivity would  
629 appear to be in conflict with efficient coding in that discarding  
630 information is a poor way to maximize it. Our results reveal  
631 how selectivity can work in concert with a circuit structure of  
632 parallel pathways to produce an efficient encoding of inputs.

633 The selective coding of features is often conflated with  
634 redundancy reduction, but it is important to make a distinc-  
635 tion in the context of efficient coding - where a redundancy  
636 reducing code is reversible and is expected to maximize in-  
637 formation about the stimulus (41). Selectivity indicates that  
638 some stimulus information will be irreversibly discarded. The  
639 existence of selective cell types that compute different aspects  
640 of the visual scene appears to confound an efficient coding  
641 framework (39). Yet, properties of selectivity are crucial to  
642 the functions of a diverse array of cell types, such as object-  
643 selective cells in medial temporal lobe (49), face-selective cells  
644 in the inferior temporal cortex (50, 51), and direction-selective  
645 cells, orientation-selective cells, and edge detector cells in the  
646 retina (52). Furthermore, many cell types in the retina and  
647 other circuits have both an ON and an OFF variant, indicating  
648 that this kind of ON/OFF selectivity is beneficial to sensory  
649 information processing (20, 32).

650 **Implications for artificial neural networks.** Although mean and  
651 contrast are elementary features of visual inputs, the striations  
652 seen in the response space in Figure 4 (NSC, right plots)  
653 reflect the concept that hidden nonlinear neural units can  
654 facilitate the categorization of stimulus features (53). In our  
655 study simply inserting nonlinear subunits with uniform weights  
656 immediately produced a representation that may enable linear  
657 classification or decoding of the mean and contrast levels of  
658 the input.

659 Feedforward artificial neural networks (ANNs) were inspired  
660 by the layered organization of biological neural networks. Neu-  
661 ral units have activation functions, or static nonlinearities, that  
662 transform inputs. Rectified Linear Units (ReLU) such as those  
663 used in our nonlinear neural units, enforce a strict selectiv-  
664 ity for inputs above threshold; whereas smooth nonlinearities  
665 implement a less rigid selectivity, if at all. In both cases,  
666 selectivity is dependent on the bias and weight parameters,  
667 which can be adjusted by learning, to offset the nonlinearity  
668 such that it truncates the input distribution to various de-  
669 grees. The ReLU frequently has the best performance among  
670 other nonlinear activation functions (54, 55) in tasks ranging  
671 from the discrimination of handwritten digits to restricted



672 Boltzmann machines (56). The findings presented here of the  
 673 information preserving capabilities of a selectivity-inducing  
 674 nonlinear activation within an architecture that is reminis-  
 675 cent of a feedforward ANN complement our knowledge of the  
 676 ReLU's favorable performance in machine learning and the  
 677 remarkable classification capabilities of ANNs.

678 **Future directions.** The interaction between noise and the non-  
 679 linearities, convergence, and divergence studied here is poten-  
 680 tially very interesting. Our results did not depend on noise  
 681 explicitly; however, we note that the discretization of the re-  
 682 sponse distributions effectuates a low level of output noise  
 683 because stimuli that fall into the same discrete bin cannot  
 684 be disambiguated. In SI Appendix Figure S1, we explicitly  
 685 introduce weak noise after the subunit summation and confirm  
 686 that our main results continue hold: the NSC maintains an  
 687 advantage over the LSC.

688 Overall, the magnitude and source of noise can have a  
 689 large effect on a circuit's ability to encode stimulus informa-  
 690 tion. As a preliminary check, we confirmed that one of these  
 691 known effects carries over to our convergent/divergent circuit.  
 692 In a theoretical study of divergent ON/OFF neuron motifs,  
 693 Brinkman et al (37) found that for low noise conditions, mutual  
 694 information is optimized by nonlinearities that cross at their  
 695 "lower bend," similar to the default crossing at zero threshold  
 696 for the rectifying ON and OFF nonlinearities in our study. For  
 697 high noise conditions, the mutual information is optimized by  
 698 nonlinearities that overlap, suggesting redundancy in these  
 699 cases. We confirmed this effect in a convergent/divergent  
 700 circuit with noise after the summed subunits (SI Appendix,  
 701 Fig. S10). Our future studies will build on these preliminary  
 702 explorations to more completely describe the effects of noise  
 703 on optimal coding within these circuits.

704 Additionally, our model did not include temporal dynamics.  
 705 We opted for a granular, geometrical analysis of the set of all  
 706 possible responses to a fixed and finite set of stimuli so that  
 707 we could clearly ascertain the counterintuitive finding that a  
 708 convergent, divergent circuit can preserve more information  
 709 with rectified nonlinear subunits than with linear subunits.  
 710 Despite the lack of temporal dynamics, we compared the effects  
 711 of different output nonlinearities which abstractly approximate  
 712 different spike generating mechanisms. Future studies will  
 713 explicitly include time-dependence to investigate how adapting  
 714 subunit nonlinearities impact the efficient encoding of inputs  
 715 with changing stimulus statistics.

## 716 Materials and Methods

717 We used Shannon's information (16) to quantify the information  
 718 retention of our model circuits because it quantifies how many  
 719 distinct neural responses are possible given a particular stimulus  
 720 distribution, and this relates to the specificity of encoding even  
 721 though it does not indicate which specific stimulus features are  
 722 encoded. Since there was no noise anywhere in the circuit, the  
 723 mutual information between the stimulus and the response reduces  
 724 to the entropy of the response. Mutual information is defined as  
 725 (17):

$$726 \quad MI = H[r] - \langle H[r|s] \rangle \quad [1]$$

727 Where  $r$  is the output response and  $s$  is the stimulus input.  $H[r]$   
 728 is the response entropy and  $H[r|s]$  is the conditional entropy of the  
 729 response given a stimulus,  $s$ .

730 In our study, there is a deterministic relationship between the  
 731 response and the stimulus due to the lack of noise. The second

731 term of the MI goes to zero and one is left with the entropy of  
 732 the response. We were careful to avoid any effects that could  
 733 distort the interpretation of the entropy. The ReLU was ideal here  
 734 because it compresses the input signal without necessarily scaling  
 735 it. In our model, the compression was entirely derived from the  
 736 non-invertibility of the nonlinearity rather than a linear gain factor.

737 The convergent structure of the retina reduces the dimension  
 738 of the high-resolution visual input it receives, placing an upper  
 739 bound on the amount of information that can possibly be trans-  
 740 mitted through the optic nerve. In general, the data compression  
 741 implemented by the circuit architecture may perform lossless or  
 742 lossy compression or some combination, depending on the statistics  
 743 of the inputs. In this study, we focus on lossy compression. By  
 744 using sample "images" of uncorrelated gaussian random inputs (i.e.  
 745 no redundant structure), we place the inputs into a regime where  
 746 lossless compression is impossible or assumed to have already taken  
 747 place. Therefore, the circuit configuration that experiences less  
 748 information loss has a higher entropy than that which experiences  
 749 more information loss relative to the information contained in the  
 750 stimulus. We thus consider higher entropy to be an indication of  
 751 better performance.

752 **Model simulations and visualizations.** All simulations, visualizations,  
 753 and entropy computations were done in Matlab. The dimension of  
 754 the stimulus always matches the dimension of the subunits within a  
 755 pathway, and a stimulus consists of  $N$  stimulus inputs. For example,  
 756 if there are 5 subunits in each of the ON and OFF pathways, then  
 757 the stimulus has 5 stimulus inputs (sometimes referred to as pixels).  
 758 Each stimulus input was independently drawn from a gaussian  
 759 distribution with arbitrary units ( $\mu = 0, \sigma = 10$ ). Each subunit  
 760 receives input from one stimulus input. For all figures in this paper,  
 761 linear subunits did not transform stimulus inputs and therefore the  
 762 ON linear subunit response was equivalent to the stimulus input and  
 763 the OFF linear subunit response was the negative of the stimulus  
 764 input.

765 All weights were uniform with unit weights from stimulus inputs  
 766 to subunits and normalized weights from subunits to outputs. The  
 767 subunits were normalized so that the variance of the linear sum  
 768 of subunits is maintained. With  $N$  subunits, each subunit weight  
 769 is  $1/\sqrt{N}$ . This normalization facilitated a comparison between  
 770 circuit configurations with linear and nonlinear subunits and varying  
 771 numbers of convergent subunits. All circuit configurations are  
 772 subject to the same uniform weighting and subunit normalization  
 773 throughout the paper except where noted in the Supplemental  
 774 Information.

775 Each rectified nonlinear unit has unit slope (slope =  $\pm 1$ ) and  
 776 applies a threshold to the stimulus input - effectively a positive-pass  
 777 filter for ON subunits and a negative-pass filter for OFF subunits.

778 The output neuron linearly sums the subunit responses in its  
 779 pathway and then applies the output nonlinearity. The output  
 780 response to a given stimulus is a single value that represents a steady  
 781 state response, as our model does not have temporal dynamics.

$$782 \quad R_{ON \text{ nonlinear subunit}}(s) = \begin{cases} s, & \text{if } s > 0 \\ 0, & \text{otherwise} \end{cases} \quad [2]$$

$$783 \quad R_{OFF \text{ nonlinear subunit}}(s) = \begin{cases} -s, & \text{if } s < 0 \\ 0, & \text{otherwise} \end{cases} \quad [3]$$

784 For the summed subunit response before or without an output  
 785 nonlinearity in a single pathway,

$$786 \quad R_{summed} = \sum_i^N \frac{1}{\sqrt{N}} R_{subunit \ i} \quad [4]$$

787 And with an output nonlinearity, the single pathway output  
 788 response is

$$789 \quad R_{output} = \begin{cases} R_{summed}, & \text{if } R_{summed} > 0 \\ 0, & \text{otherwise} \end{cases} \quad [5]$$

790 The optimal sigmoidal output nonlinearity was computed as the  
 791 cumulative gaussian of the summed subunit distribution, bounded  
 792 by the maximum and minimum summed subunit values:  
 793

$$R_{CG \text{ output}}(x) = (\max(x) - \min(x))CDF(x) + \min(x) \quad [6]$$

$$CDF(x) = \frac{1}{2} [1 + \operatorname{erf}(\frac{x - \mu}{\sigma\sqrt{2}})] \quad [7]$$

789 **Visualizations in stimulus, subunit, and response spaces.** Each  
790 quadrant was color-coded such that:  $s_1 > 0, s_2 > 0$ : blue;  $s_1 <$   
791  $0, s_2 > 0$ : orange;  $s_1 < 0, s_2 < 0$ : yellow;  $s_1 > 0, s_2 < 0$ : purple.  
792 Output response histograms in Figure 3 are also color-coded in  
793 this way to show which response bins represent which stimuli. For  
794 mean luminance and contrast visualization, spaces were color-coded  
795 to indicate bands of mean stimulus luminances,  $M$ , and stimulus  
796 contrasts,  $\Lambda$ . Each stimulus image,  $\Upsilon$ , consists of  $N$  stimulus inputs,  
797  $\Upsilon = [s_1, s_2, \dots, s_N]$ . In Figures 3A-E and 4,  $N = 2$ .

$$M(\Upsilon) = \frac{s_1 + s_2 + \dots + s_N}{N} \quad [8]$$

$$\Lambda(\Upsilon) = \left| \sqrt{\frac{1}{2} \sum_i (s_i - \langle s \rangle)^2} \right| \quad [9]$$

798 **Entropy calculations.** Entropy computations were done by simulat-  
799 ing the circuit responses to batches of stimulus samples. Discrete  
800 entropy was used to quantify continuous stimulus and response dis-  
801 tributions. Distributions of stimuli and responses were binned and  
802 probabilities were computed from the binned distributions. These  
803 binned probability distributions were used to calculate the entropy of  
804 the responses. Information entropy is defined as

$$H = - \sum P[r] \log_2 P[r] \quad [10]$$

805 where  $P[r]$  is a discrete probability distribution.

The entropy quantities presented are the average over 10 batches  
of samples. The normalized entropy was computed by dividing the  
entropy of the circuit by the entropy of the sum of linear subunits.  
Thus,

$$H_{\text{normalized}} = H_{\text{output}} / H_{\text{summed linear subunits}} \quad [11]$$

806 The entropy of the summed linear subunits was the same  
807 for the single pathway as it was for the divergent pathways  
808 ( $H_{\text{summed linear subunits}} = 7.37$  bits) since the OFF linear sub-  
809 units are perfectly anti-correlated with the ON linear subunits and  
810 do not provide additional information. The subunit normalization  
811 facilitated a comparison between the entropies of the circuit con-  
812 figurations in Figures 2 and 3 and across different quantities of  
813 converging inputs.

814 A Freedman-Diaconis histogram bin approximation was used to  
815 determine an appropriate bin width for the stimulus and response  
816 distributions (57). A consistent bin width of 0.25 was used for all  
817 entropy calculations to facilitate comparison. This bin width was  
818 used for all dimensions. For example, in a 2-dimensional response  
819 space, bins would be boxes that are 0.25 x 0.25. These discretization  
820 parameters were chosen carefully to ensure that the bins were  
821 sufficiently small to capture the shape of the distributions, but  
822 not so small that the  $\log(N)$  bound was reached. The Freedman-  
823 Diaconis estimation returns a bin width that minimizes the difference  
824 between the areas under the curves of the discrete and continuous  
825 distributions.

826 To ensure confidence in the entropy calculation, the sample  
827 batch size was computed as follows. First, binned entropies were  
828 computed for gaussian distributions with a range of variances and  
829 a range of batch sizes. Then, the entropy error was computed as  
830 the absolute difference between these numerical binned entropies  
831 and their corresponding analytic binned entropies (eqn. 12). Linear  
832 fits of the entropy error as a function of batch size were computed  
833 for each value of distribution variance individually. Then another  
834 linear fit was performed for those first fit parameters as a function  
835 of distribution variance. This procedure produced a general expression  
836 for the entropy error given distribution variance and batch size.  
837 We chose an entropy error tolerance of 0.005 which we used to  
838 determine an appropriate batch size. The minimum batch size for

entropy computations in the main text was  $10^6$  samples. Smaller  
batch sizes were permitted for noise entropy computations in the  
Supplemental Appendix.

The 36-dimensional input space used in Figure 1E,F was too  
large for a numerical computation of the entropy. Its discrete  
entropy was estimated analytically from its continuous entropy with  
a bin-correction term as in equation 12 where  $m = 36$ , bin width  $b$   
 $= 0.25$ , and  $K$  is the covariance matrix of the stimuli.

$$H(s) = h(s) - m \log_2(b) = \frac{1}{2} \log_2[(2\pi e)^m |K|] - m \log_2(b) \quad [12]$$

**Data Availability.** All simulations and analyses were done in Matlab  
using custom-written scripts. These can be found on the correspond-  
ing author's Github page: [https://github.com/gabriele9/nonlinear-  
convergence-info-entropy-retention](https://github.com/gabriele9/nonlinear-convergence-info-entropy-retention).

**ACKNOWLEDGMENTS.** We thank Joel Zylberberg, Stephen  
Baccus, Max Turner, Adree Songco-Aguas, Iris Jianghong Shi, and  
Matthew Farrell for their helpful feedback and comments on the  
manuscript and Leenoy Meshulam for their helpful discussions.

Funding sources: GJG is supported by NIH NINDS K22  
1K22NS104187-01A1 and WRF UWIN postdoc fellowship, ETSB  
was supported by the Boeing professorship in Applied Mathematics  
at UW and the UW Center for Sensorimotor Neural Engineering.  
FR is supported by EY028111.

1. JM Jeanne, RI Wilson, Convergence, Divergence, and Reconvergence in a Feedforward Network Improves Neural Speed and Accuracy. *Neuron* **88**, 1014–1026 (2015).
2. L Zhaoqing, Theoretical understanding of the early visual processes by data compression and data selection. *Network: Comput. Neural Syst.* **17**, 301–334 (2006).
3. S Nirenberg, SM Carceri, AL Jacobs, PE Latham, Retinal ganglion cells act largely as independent encoders. *Nature* **411**, 698–701 (2001).
4. K Koch, et al., How much the eye tells the brain. *Curr. Biol.* **16**, 1428–1434 (2006).
5. K Koch, et al., Efficiency of information transmission by retinal ganglion cells. *Curr. Biol.* **14**, 1523–1530 (2004).
6. JB Demb, JH Singer, Functional Circuitry of the Retina. *Annu. review vision science* **1**, 263–289 (2015).
7. C Enroth-Cugell, JG Robson, The contrast sensitivity of retinal ganglion cells of the cat. *The J. physiology* **187**, 517–552 (1966).
8. C Enroth-Cugell, AW Freeman, The receptive-field spatial structure of cat retinal Y cells. *The J. Physiol.* **384**, 49–79 (1987).
9. S Hochstein, RM Shapley, Linear and Nonlinear Spatial Subunits in Y Cat Retinal Ganglion Cells. *The J. physiology* **262**, 265–284 (1976).
10. HB Barlow, Summation and inhibition in the frog's retina. *The J. Physiol.* **119**, 69–88 (1953).
11. MH Turner, GW Schwartz, F Rieke, Receptive field center-surround interactions mediate context-dependent spatial contrast encoding in the retina. *eLife* **7**, e38841 (2018).
12. JB Demb, L Haarsma, MA Freed, P Sterling, Functional circuitry of the retinal ganglion cell's nonlinear receptive field. *J Neurosci* **19**, 9756–9767 (1999).
13. MH Turner, F Rieke, Synaptic Rectification Controls Nonlinear Spatial Integration of Natural Visual Inputs. *Neuron* **90**, 1257–1271 (2016).
14. HK Hartline, The effects of spatial summation in the retina on the excitation of the fibers of the optic nerve. *Am. J. Physiol. Content* **130**, 700–711 (1940).
15. MA Freed, P Sterling, The ON-alpha ganglion cell of the cat retina and its presynaptic cell types. *J. Neurosci.* **8**, 2303–2320 (1988).
16. CE Shannon, W Weaver, *The mathematical theory of communication*. (Univ. of Illinois Press, Urbana), (1949) OCLC: 246600266.
17. TM Cover, JA Thomas, *Elements of information theory*. (Wiley-Interscience, Hoboken, N.J.), 2nd ed edition, (2006) OCLC: ocm59879802.
18. P Reinagel, Information theory in the brain. *Curr. Biol.* **10**, R542–R544 (2000).
19. AJ Bell, TJ Sejnowski, An Information Maximization Approach to Blind Separation and Blind Deconvolution. *Neural computation* **7**, 1129–1159 (1995).
20. JJ Atick, Could information theory provide an ecological theory of sensory processing? *Network: Comput. Neural Syst.* **3**, 213–251 (1992).
21. F Attneave, Some informational aspects of visual perception. *Psychol. Rev.* **61**, 183–193 (1954).
22. HB Barlow, Possible principles underlying the transformation of sensory messages in *Sensory communication*, ed. WA Rosenblith. (MIT Press), pp. 217–234 (1961).
23. S Laughlin, A Simple Coding Procedure Enhances a Neurons Information Capacity. *Zeitschrift Fur Naturforschung C-a J. Biosci.* **36**, 910–912 (1981).
24. SE Palmer, O Marre, MJ Berry, W Bialek, Predictive information in a sensory population. *Proc. Natl. Acad. Sci. United States Am.* **112**, 6908–6913 (2015).
25. F Rieke, DK Warland, RR de Ruyter van Steveninck, W Bialek, *Spikes: exploring the neural code*, Computational neuroscience. (MIT Press, Cambridge, Mass.), (1997).
26. P Sterling, S Laughlin, *Principles of neural design*. (2015).
27. V Balasubramanian, P Sterling, Receptive fields and functional architecture in the retina. *The J. Physiol.* **587**, 2753–2767 (2009).
28. JJ Atick, AN Redlich, Towards a Theory of Early Visual Processing. *Neural Comput.* **2**, 308–320 (1990).

- 912 29. N Brenner, W Bialek, RD van Steveninck, Adaptive rescaling maximizes information transmis-  
913 sion. *Neuron* **26**, 695–702 (2000).
- 914 30. AL Fairhall, GD Leven, W Bialek, R van Steveninck, Efficiency and ambiguity in an adaptive  
915 neural code. *Nature* **412**, 787–792 (2001).
- 916 31. B Wark, BN Lundstrom, A Fairhall, Sensory adaptation. *Curr. Opin. Neurobiol.* **17**, 423–429  
917 (2007).
- 918 32. J Gjorgjieva, H Sompolinsky, M Meister, Benefits of pathway splitting in sensory coding. *J*  
919 *Neurosci* **34**, 12127–12144 (2014).
- 920 33. TO Sharpee, JA Berkowitz, Linking neural responses to behavior with information-preserving  
921 population vectors. *Curr. Opin. Behav. Sci.* **29**, 37–44 (2019).
- 922 34. A Fairhall, E Shea-Brown, A Barreiro, Information theoretic approaches to understanding  
923 circuit function. *Curr. Opin. Neurobiol.* **22**, 653–659 (2012).
- 924 35. E Schneidman, W Bialek, MJ Berry, Synergy, Redundancy, and Independence in Population  
925 Codes. *J. Neurosci.* **23**, 11539–11553 (2003).
- 926 36. N Brenner, SP Strong, R Koberle, W Bialek, RR de Ruyter van Steveninck, Synergy in a  
927 Neural Code. *Neural Comput.* **12**, 1531–1552 (2000).
- 928 37. BAW Brinkman, AI Weber, F Rieke, E Shea-Brown, How Do Efficient Coding Strategies De-  
929 pend on Origins of Noise in Neural Circuits? *PLoS comp bio* **12**, e1005150 (2016).
- 930 38. DB Kastner, SA Baccus, TO Sharpee, Critical and maximally informative encoding between  
931 neural populations in the retina. *Proc. Natl. Acad. Sci. United States Am.* **112**, 2533–2538  
932 (2015).
- 933 39. X Pitkow, M Meister, Decorrelation and efficient coding by retinal ganglion cells. *Nat. Neurosci.*  
934 **15**, 628–635 (2012).
- 935 40. JL Puchalla, E Schneidman, RA Harris, MJ Berry, Redundancy in the Population Code of the  
936 Retina. *Neuron* **46**, 493–504 (2005).
- 937 41. H Barlow, Redundancy reduction revisited. *Network: Comput. Neural Syst.* **12**, 241–253  
938 (2001).
- 939 42. CF Stevens, What the fly's nose tells the fly's brain. *PNAS* **112**, 9460–9465 (2015).
- 940 43. Y Zhang, TO Sharpee, A Robust Feedforward Model of the Olfactory System. *PLoS Comput.*  
941 *Biol* **12**, e1004850 (2016).
- 942 44. S Qin, Q Li, C Tang, Y Tu, Optimal compressed sensing strategies for an array of nonlinear  
943 olfactory receptor neurons with and without spontaneous activity. *Proc Natl Acad Sci USA*  
944 **116**, 20286–20295 (2019).
- 945 45. D Zwicker, A Murugan, MP Brenner, Receptor arrays optimized for natural odor statistics.  
946 *Proc Natl Acad Sci USA* **113**, 5570–5575 (2016).
- 947 46. O Schwartz, EP Simoncelli, Natural signal statistics and sensory gain control. *Nat Neurosci*  
948 **4**, 819–825 (2001).
- 949 47. T Gollisch, Features and functions of nonlinear spatial integration by retinal ganglion cells. *J.*  
950 *physiology, Paris* **107**, 338–348 (2013).
- 951 48. T Gollisch, M Meister, Eye Smarter than Scientists Believed: Neural Computations in Circuits  
952 of the Retina. *Neuron* **65**, 150–164 (2010).
- 953 49. MJ Ison, et al., Selectivity of pyramidal cells and interneurons in the human medial temporal  
954 lobe. *J Neurophys* **106**, 1713–1721 (2011).
- 955 50. S Eifuku, WC De Souza, R Tamura, H Nishijo, T Ono, Neuronal Correlates of Face Identifica-  
956 tion in the Monkey Anterior Temporal Cortical Areas. *J. Neurophysiol.* **91**, 358–371 (2004).
- 957 51. ME Hasselmo, ET Rolls, GC Baylis, The role of expression and identity in the face-selective  
958 responses of neurons in the temporal visual cortex of the monkey. *Behav. Brain Res.* **32**,  
959 203–218 (1989).
- 960 52. JR Sanes, RH Masland, The types of retinal ganglion cells: current status and implications  
961 for neuronal classification. *Annu. review neuroscience* **38**, 221–246 (2015).
- 962 53. J DiCarlo, D Zoccolan, N Rust, How Does the Brain Solve Visual Object Recognition? *Neuron*  
963 **73**, 415–434 (2012).
- 964 54. X Glorot, A Bordes, Y Bengio, Deep sparse rectifier neural networks in *Journal of Machine*  
965 *Learning Research*. (Universite de Technologie de Compiègne, Compiègne, France), pp.  
966 315–323 (2011).
- 967 55. Y LeCun, Y Bengio, G Hinton, Deep learning. *Nature* **521**, 436–444 (2015).
- 968 56. V Nair, GE Hinton, Rectified linear units improve Restricted Boltzmann machines in *ICML*  
969 *2010 - Proceedings, 27th International Conference on Machine Learning*. (University of  
970 Toronto, Toronto, Canada), pp. 807–814 (2010).
- 971 57. D Freedman, P Diaconis, On the histogram as a density estimator:L 2 theory. *Z. Wahrschein-*  
972 *lichkeitstheorie verw Gebiete* **57**, 453–476 (1981).

# PNAS

[www.pnas.org](http://www.pnas.org)

1

## 2 **Supplementary Information for**

### 3 **Nonlinear convergence boosts information coding in circuits with parallel outputs**

4 **Gabrielle J. Gutierrez, Fred Rieke and Eric T. Shea-Brown**

5 **Gabrielle J. Gutierrez.**  
6 **E-mail: [ellag9@uw.edu](mailto:ellag9@uw.edu)**

#### 7 **This PDF file includes:**

- 8     Supplementary text
- 9     Figs. S1 to S10
- 10    SI References

## 11 Supporting Information Text

### 12 Appendix I: Analytic derivation of variance of summed nonlinear subunits distribution

13 The nonlinear subunit responses are described by a rectified gaussian distribution which has variance,  $\sigma_R^2$ .

$$14 \sigma_R^2 = \sigma_t^2 \sigma^2 \text{ where} \quad [1]$$

$$15 \sigma_t^2 = \frac{\mu_t^2 + 1}{2} \left[ \operatorname{erf}\left(\frac{d}{\sqrt{2}}\right) - \operatorname{erf}\left(\frac{c}{\sqrt{2}}\right) \right] - \frac{1}{\sqrt{2\pi}} \left[ (d - 2\mu_t)e^{-\frac{d^2}{2}} - (c - 2\mu_t)e^{-\frac{c^2}{2}} \right] + \frac{(c - \mu_t)^2}{2} \left[ 1 - \operatorname{erf}\left(\frac{c}{\sqrt{2}}\right) \right] + \frac{(d - \mu_t)^2}{2} \left[ 1 - \operatorname{erf}\left(\frac{d}{\sqrt{2}}\right) \right]$$

$$16 \mu_t = \frac{1}{\sqrt{2\pi}} \left[ e^{-\frac{c^2}{2}} - e^{-\frac{d^2}{2}} \right] + \frac{c}{2} \left[ 1 - \operatorname{erf}\left(\frac{c}{\sqrt{2}}\right) \right] + \frac{d}{2} \left[ 1 - \operatorname{erf}\left(\frac{d}{\sqrt{2}}\right) \right] \quad [3]$$

$$17 c = \frac{a - \mu}{\sigma} \quad [4]$$

$$18 d = \frac{b - \mu}{\sigma} \quad [5]$$

19 where  $\sigma^2$  and  $\mu$  are the variance and mean, respectively, of the unrectified distribution which would be the same as the  
20 variance and mean of the summed linear subunits distribution. The lower and upper bounds of the rectified gaussian distribution  
21 are given by  $a$  and  $b$ , respectively, however, in our case the upper bound is infinite.

22 With  $\mu = 0$ ,  $\sigma = 10$ ,  $a = 0$ ,  $b = \infty$ , we obtain,  $c = 0$ ,  $d = \infty$ ,  $\mu_t = \frac{1}{\sqrt{2\pi}}$ ,  $\sigma_t^2 = \left[ \frac{1}{2} - \frac{1}{2\pi} \right] = 0.3408$ . Thus,  $\sigma_R^2 = 0.3408\sigma^2 = 34.08$ .

### 23 Appendix II: Analytic arguments for higher entropy in nonlinear subunits circuit

24 The circuit with divergent pathways and nonlinear subunits was shown to have greater entropy than the circuit with linear  
25 subunits in the numerical computations in the main paper. We provide supporting analytic arguments here, in the approximation  
26 that one takes the limit of a large (infinite) number of normalized subunits. By the central limit theorem, the summed output  
27 of the nonlinear subunits then approaches a gaussian distribution. The general continuous entropy expression for a gaussian  
28 distribution is:

$$h = \frac{1}{2} \log_2[(2\pi e)^m |K|] \quad [6]$$

29 where  $m$  is the dimension of the gaussian distribution. With ON and OFF outputs,  $m = 2$ .  $K$  is the determinant of the  
30 covariance matrix of the output distribution, with variance  $\sigma^2$  and correlation coefficient  $\rho$  between the ON and OFF outputs  
31 ( $0 \leq \rho^2 \leq 1$ ):

$$|K| = (\sigma^2)^2 (1 - \rho^2) \quad [7]$$

32 For the sum of linear subunits,  $\rho_{lin} = -1$ , and  $\sigma^2 = 100$ . For the sum of nonlinear subunits, we denote  $\sigma_{nl}^2 = \sigma_t^2 \sigma^2$  (see  
33 Appendix I for analytical derivation of the factor  $\sigma_t^2$ ). These values hold for all subunit dimensions because the subunits are  
34 normalized.

35 The entropy equation can be expanded to:

$$h = \log_2(2\pi e) + \log_2(\sigma^2 \sqrt{1 - \rho^2}) \quad [8]$$

36 The condition that the entropy of the nonlinear subunits circuit is higher than that of the linear subunits circuit is equivalent  
37 to this inequality:

$$\sigma_{nl}^2 \sqrt{1 - \rho_{nl}^2} > \sigma^2 \sqrt{1 - \rho_{lin}^2} \quad [9]$$

38 Which can be rearranged:

$$\sigma_t^2 \sigma^2 \sqrt{1 - \rho_{nl}^2} > \sigma^2 \sqrt{1 - \rho_{lin}^2} \quad [10]$$

$$\rho_{nl}^2 < 1 - (1 - \rho_{lin}^2) / \sigma_t^4 \quad [11]$$

39 This condition is immediately satisfied since  $\rho_{lin}^2 = 1$ . The final step would be to apply the output nonlinearities, however,  
40 this would not alter the sum of nonlinear subunits and would only serve to reduce the entropy of the sum of linear subunits.  
41 Therefore the sum of nonlinear subunits will always have a higher entropy than the sum of linear subunits (for the particular  
42 circuit configurations and noiseless conditions studied here).

43 To extend this analysis, we determine how much decorrelation of the ON and OFF linear pathways is tolerated before the  
44 entropy of the summed linear subunits overcomes the entropy of the summed nonlinear subunits. By rearranging equation 11  
45 and substituting in the values of  $\sigma_t^2$  (from Appendix I) and the numerically computed value of  $\rho_{nl}$  (0.4670, see Results in main  
46 text), we arrive at the following condition:

$$\rho_{lin}^2 > 1 - \sigma_t^4 + \sigma_t^4 \rho_{nl}^2 = 0.90 \quad [12]$$

47 Therefore, the linear pathways can tolerate about 10% decorrelation before overtaking the entropy of the nonlinear subunits  
48 circuit. We remind the reader that this is the case when there are no output nonlinearities. As soon as the output nonlinearities  
49 are taken into account, the linear subunits circuit remains lower than that of the nonlinear subunits circuit regardless of the  
50 extent of decorrelation induced by the orthogonalization of the weights (see Supplemental Fig. 5 and 6).

51 **Supporting Figures**

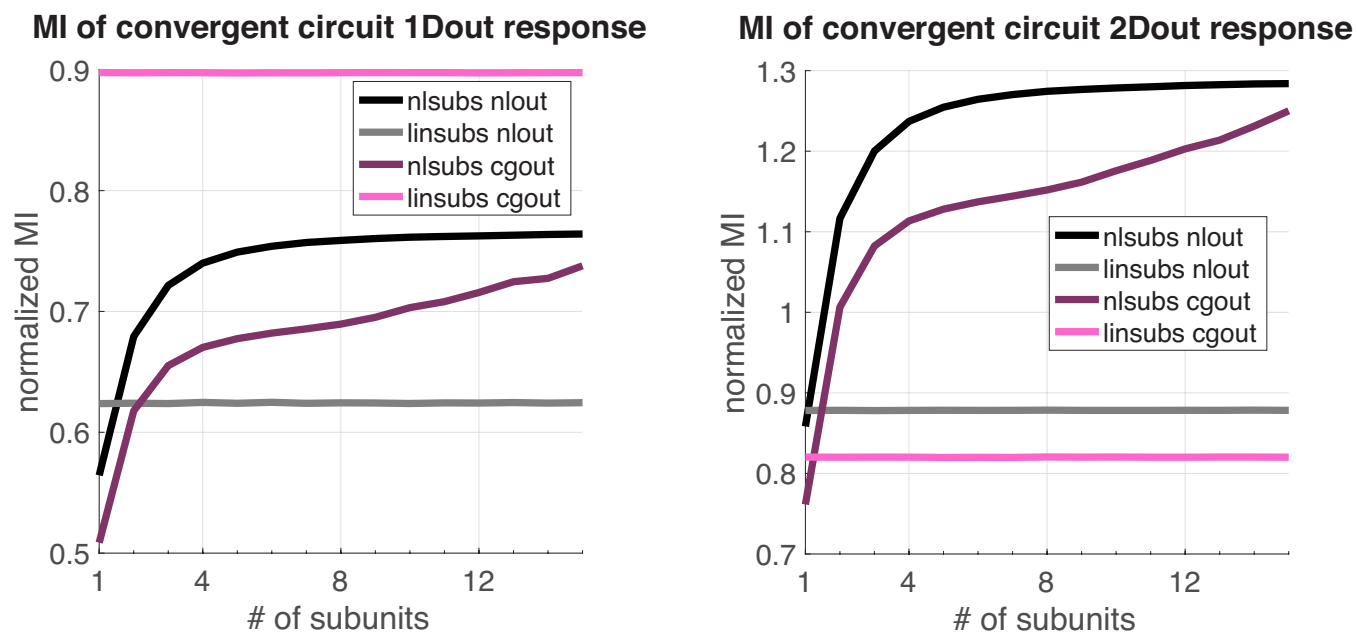

**Fig. S1.** Mutual Information for different circuit configurations with noisy outputs. Left: single pathway circuit; Right: ON and OFF pathway circuit. Black: rectifying nonlinear subunits and rectifying nonlinear output; Grey: linear subunits and rectifying nonlinear output; Dark magenta: rectifying nonlinear subunits and cumulative gaussian output nonlinearity; Pink: linear subunits and cumulative gaussian output nonlinearity. Stimulus distribution has  $\sigma_s = 10$ , noise distribution has  $\sigma_m = 1$ . Noise arrives after the subunit summation but before the output nonlinearity. The cumulative gaussian output nonlinearities are the same as in Figures 2 and 3 in the main text and were optimized for the output response distribution alone. As a result, the cumulative gaussian nonlinearity is not optimal for the response distributions that also contain noise.

As with the normalized entropies for the different circuit configurations in Figures 2 and 3 in the main text, the NSC encodes more information as the number of convergent subunits increases and it encodes more information than the LSC. There is an exception when there is only a single subunit due to the placement of the noise after the subunit response but before the output nonlinearity is applied.



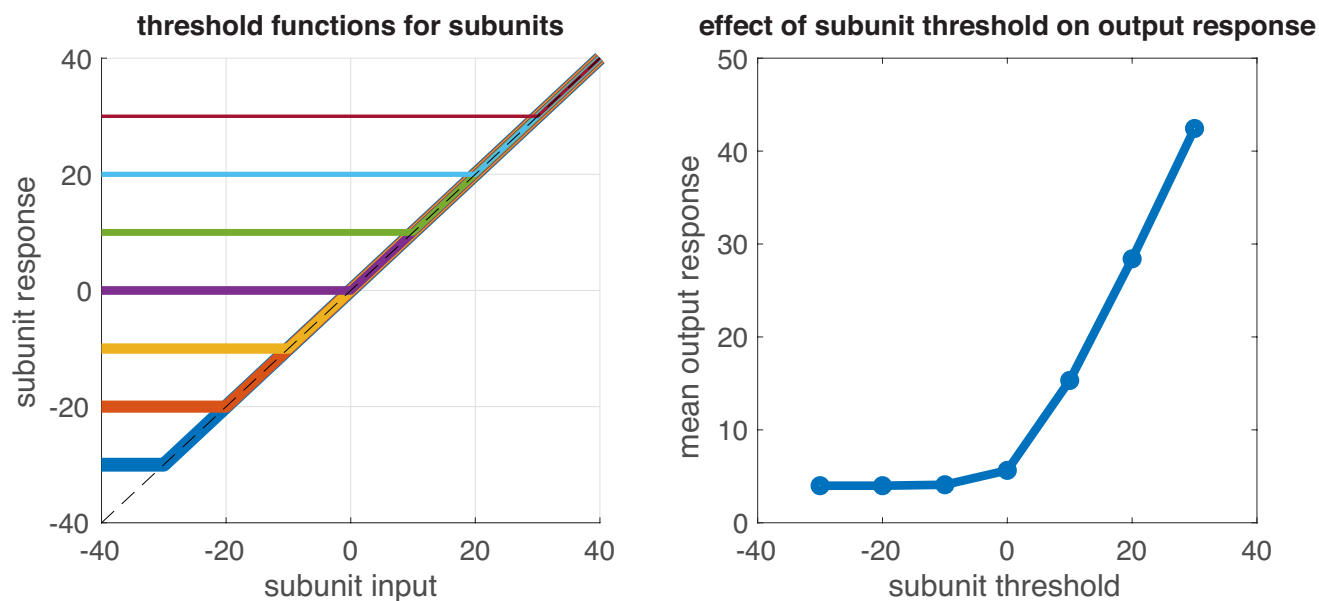

**Fig. S2.** Implementation of sliding subunit thresholds in reference to Figures S2, S3, and S4. Left, threshold implementation for subunits showing how low subunit thresholds resemble a linear response function whereas high subunit thresholds rectify much of the subunit input range. Right, mean output response of ON output neuron as a function of subunit threshold (negative thresholds indicate subunits are more linear). There are 2 ON subunits converging to a single output neuron with a rectifying nonlinearity. The output nonlinearity threshold is fixed at zero. Output response is in arbitrary rate units. As the subunit threshold increases from linear to highly rectifying, the output neuron activity increases nonlinearly.

Simulations for each subunit threshold value were run using a 2D gaussian distribution of stimuli as the stimulus inputs. The mean output response for the ON output neuron was computed by taking the mean of the ON output response distribution.

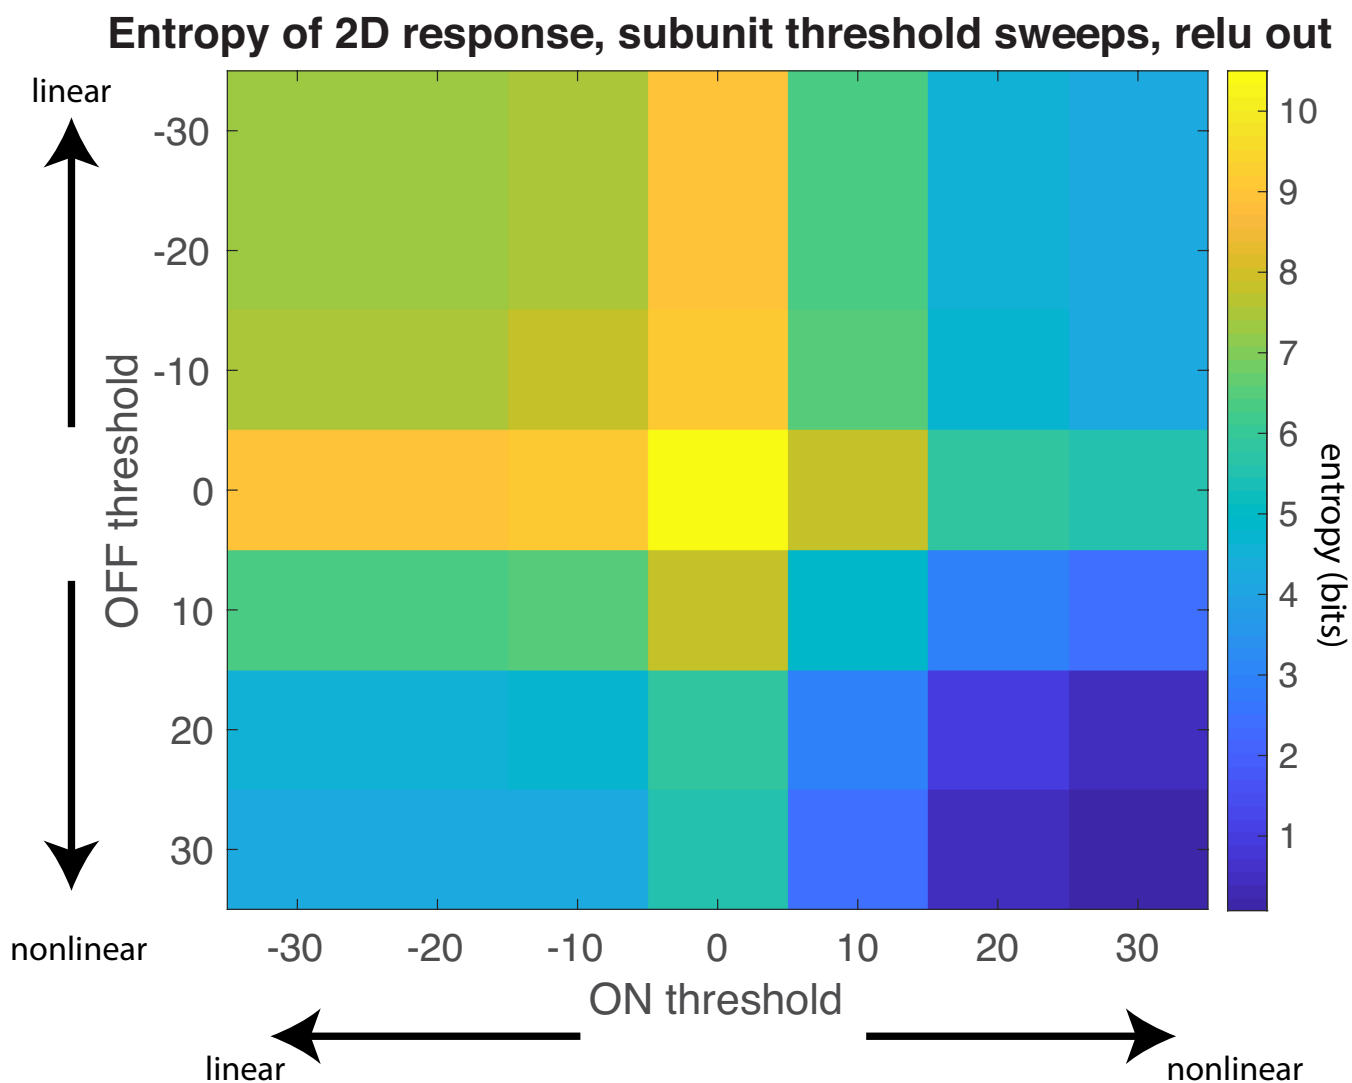

**Fig. S3.** Entropy of circuit response for different nonlinear subunit thresholds ranging from -30 to 30 (arbitrary response units). Circuit has 2 inputs, an ON and an OFF pathway, and fixed output nonlinearities thresholded at zero for each pathway. Negative thresholds approach linear subunits while positive thresholds are extremely rectified. All subunits within the same pathway have the same threshold but ON subunit thresholds can vary independently from OFF subunit thresholds in these sweeps. The highest circuit response entropy is produced when ON and OFF nonlinear subunit thresholds are at zero, which is the mean of the input distribution.

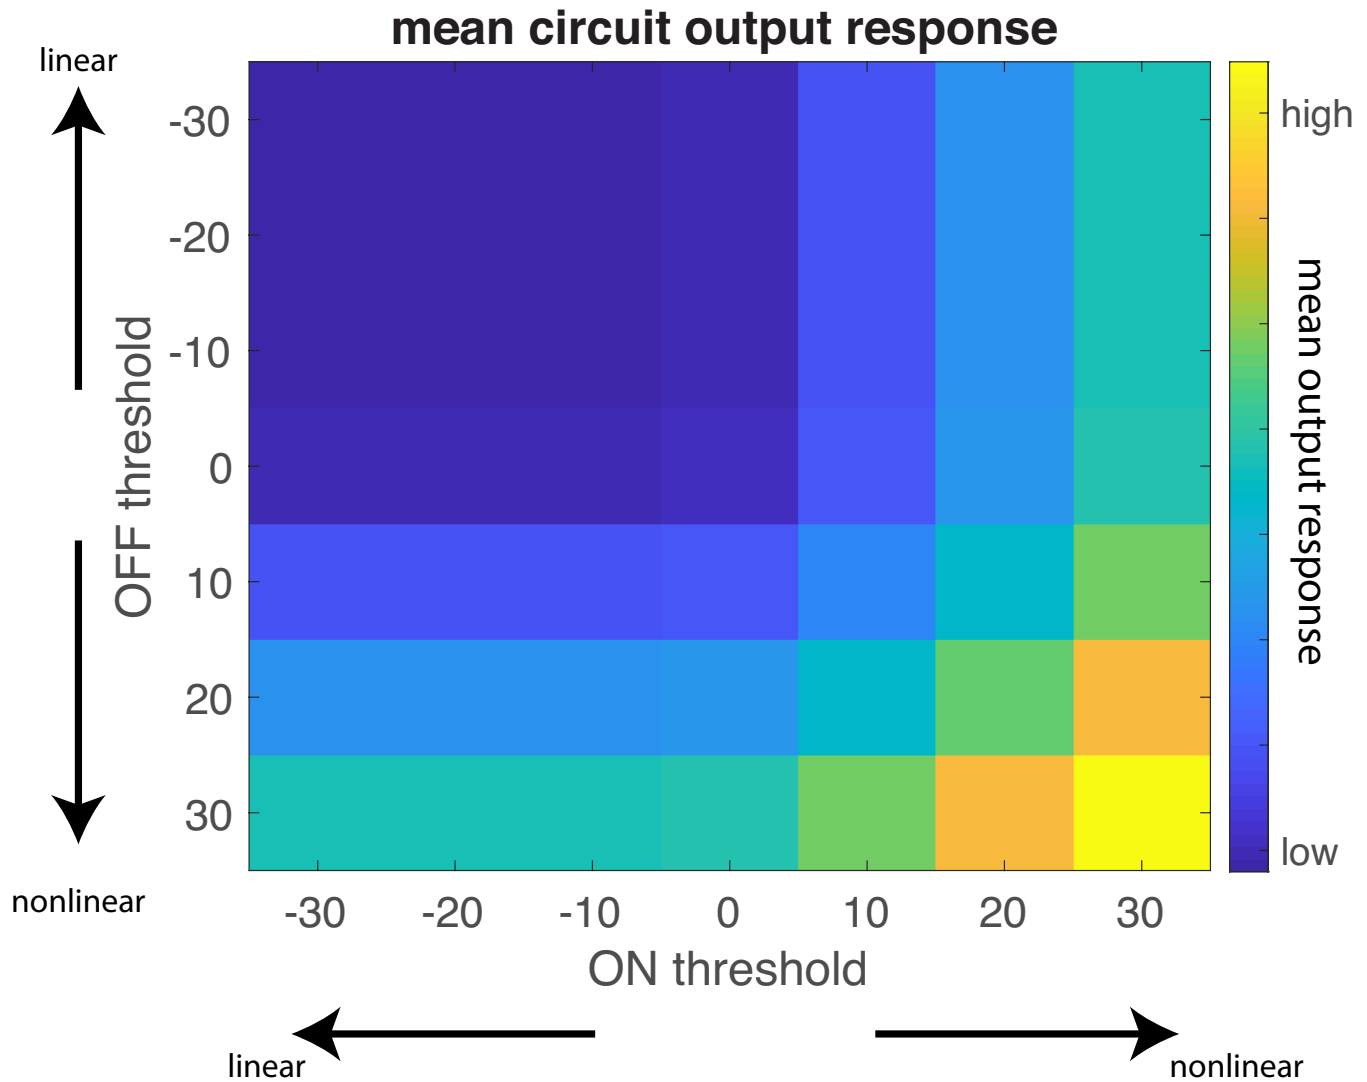

**Fig. S4.** Mean circuit output response as a function of ON and OFF subunit thresholds. Circuit has 2 inputs, an ON and an OFF pathway, and fixed output nonlinearities thresholded at zero for each pathway. Mean output response is displayed in arbitrary response units on the colorbar. Mean output response is computed as mean[ON output, OFF output]. Simulations for each combination of subunit thresholds were run using a 2D gaussian distribution of stimuli as the stimulus inputs. The mean of the ON output response distribution and the OFF output response distribution was computed before taking the mean among the ON and OFF outputs. Negative thresholds indicate more linear subunits while positive thresholds indicate more extreme subunit rectification. The extremely rectified subunits produce higher mean output responses; whereas moderately rectified or fully linear subunits produce relatively low mean output responses.

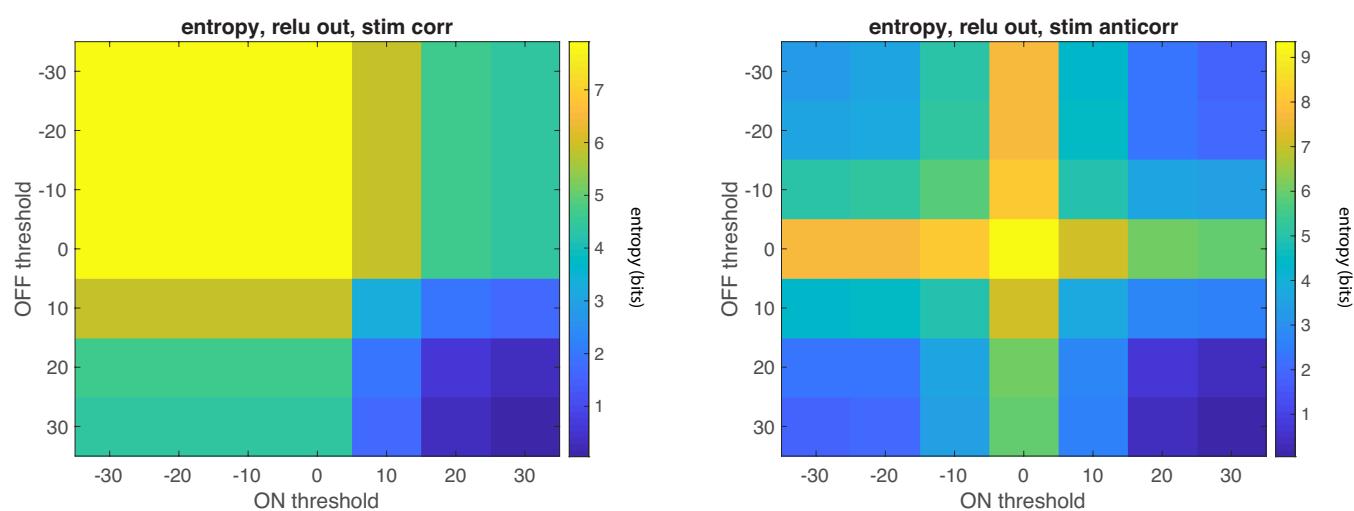

**Fig. S5.** Entropy as a function of subunit thresholds for ON and OFF pathways in a circuit with 2 inputs, an ON and an OFF pathway, and fixed output nonlinearities thresholded at zero for each pathway. Left, stimuli are highly correlated ( $cc = 0.995$ ). Right, stimuli are highly anti-correlated ( $cc = -0.995$ ). Colorbars show discrete entropy values in bits. For correlated stimuli, the entropy of the circuit is not very sensitive to the linearity of the subunits except when subunits are extremely rectifying. This reinforces the observation that nonlinear subunits thresholded at zero and linear subunits encode correlated stimuli similarly (see Fig. 3 in main text). In contrast, the circuit entropy is sensitive to anti-correlated stimuli and the entropy is highest when the ON and OFF subunit thresholds cross at zero.

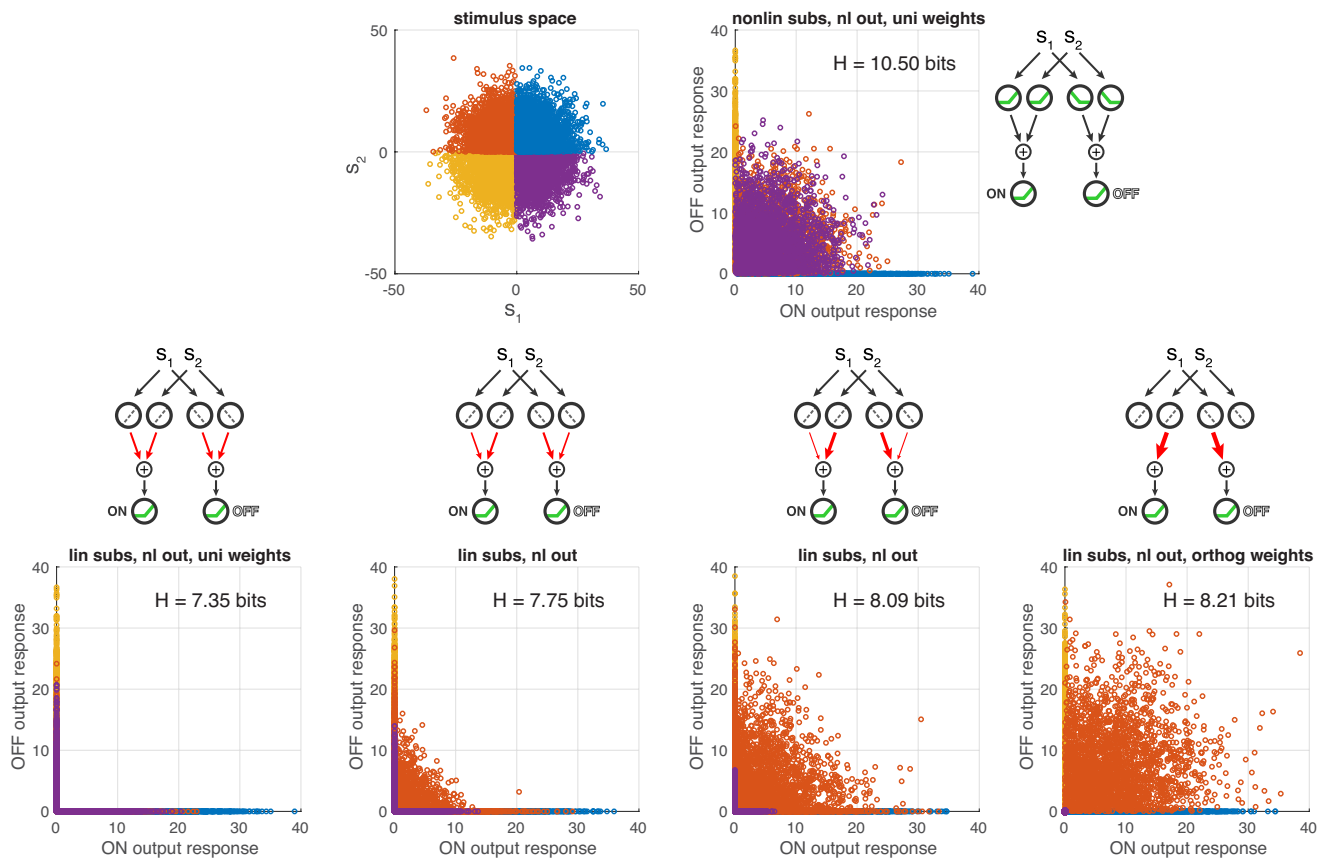

**Fig. S6.** The linear subunits can be reweighted to form an output distribution that resembles that for the NSC. Top left, stimulus space with color-coded quadrants; top right, output response space for NSC with 2 input dimensions and uniform subunit weights (as shown in schematic; also see Fig. 3E in main text). Bottom, output response space for LSC with 2 input dimensions and (left) uniform subunit weights, (2nd and 3rd from left) subunit weights rotating away from uniform, (right) orthogonal subunit weights (see Fig. S7 for depiction of weights rotation). Despite the resemblance between the response spaces in the top right and bottom right, orthogonalizing the linear subunit weights still produces lower entropy than the NSC with uniform weights. The color coding reveals that for the LSC, as the orange points are liberated from the axes, the purple points are compressed to the origin, in contrast to the case for the NSC where both the orange and purple points are pushed away from the axes. As schematized, all circuits have 2 inputs, an ON and an OFF pathway, and fixed output nonlinearities thresholded at zero.

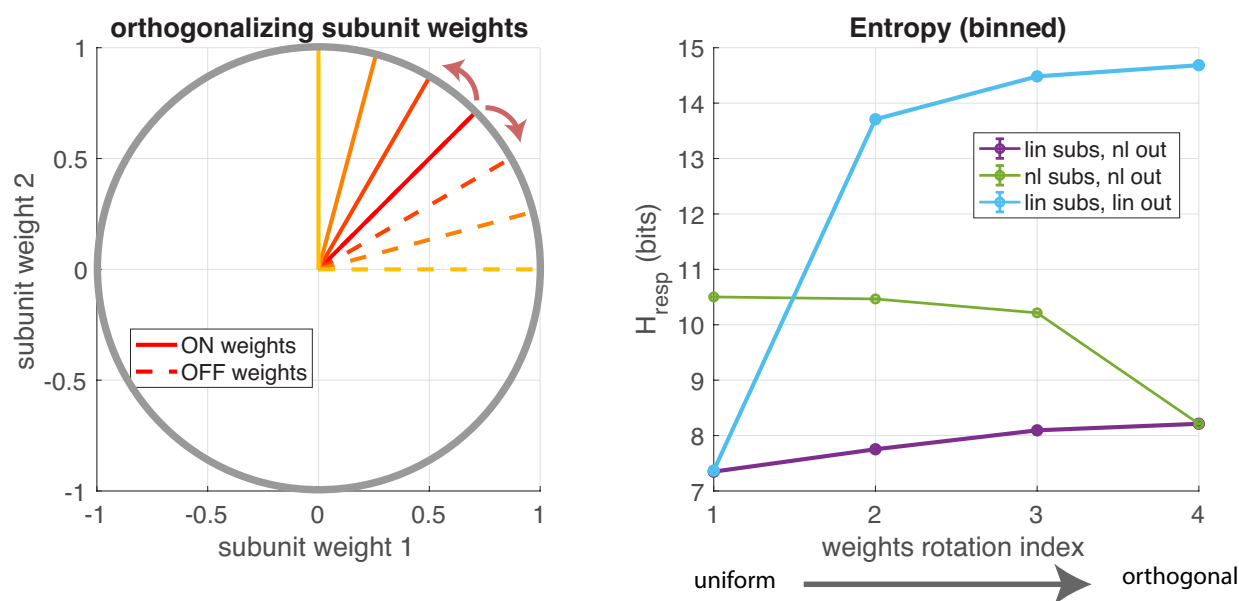

**Fig. S7.** Entropy for 3 circuit configurations as subunit weights are rotated from uniform to orthogonal. All circuit configurations have 2 inputs, and an ON and an OFF pathway. Left, since subunits are normalized by  $1/\sqrt{2}$  they are bounded by the unit circle. The uniform subunit weights are at 45 degrees whereas the orthogonal subunit weights are at 0 and 90 degrees. More explicitly, the uniform weights have  $1/\sqrt{2}$  for all subunit weights while the orthogonal weights have  $[0,1]$  for the ON subunits and  $[1,0]$  for the OFF subunits (see schematic in bottom right panel of Fig. S6 for a depiction of orthogonal weights in the circuit). Right, discrete entropy as a function of subunit weight orientation. The weights rotation index begins at the uniform subunit weights and ends at the orthogonal subunit weights. The LSC (purple curve) maintains the lowest entropy among the circuit configurations, consistent with Supplemental Figure S6. The entropy for the NSC (green curve) drops to meet the LSC when the subunit weights are completely orthogonal. In reference to the derivation in Appendix II, the entropy of the fully linear circuit (linear subunits and linear output) is shown in blue. As the subunit weights are rotated, the entropy quickly increases because there is no output nonlinearity to constraint the output space as the ON and OFF pathways become entirely independent.

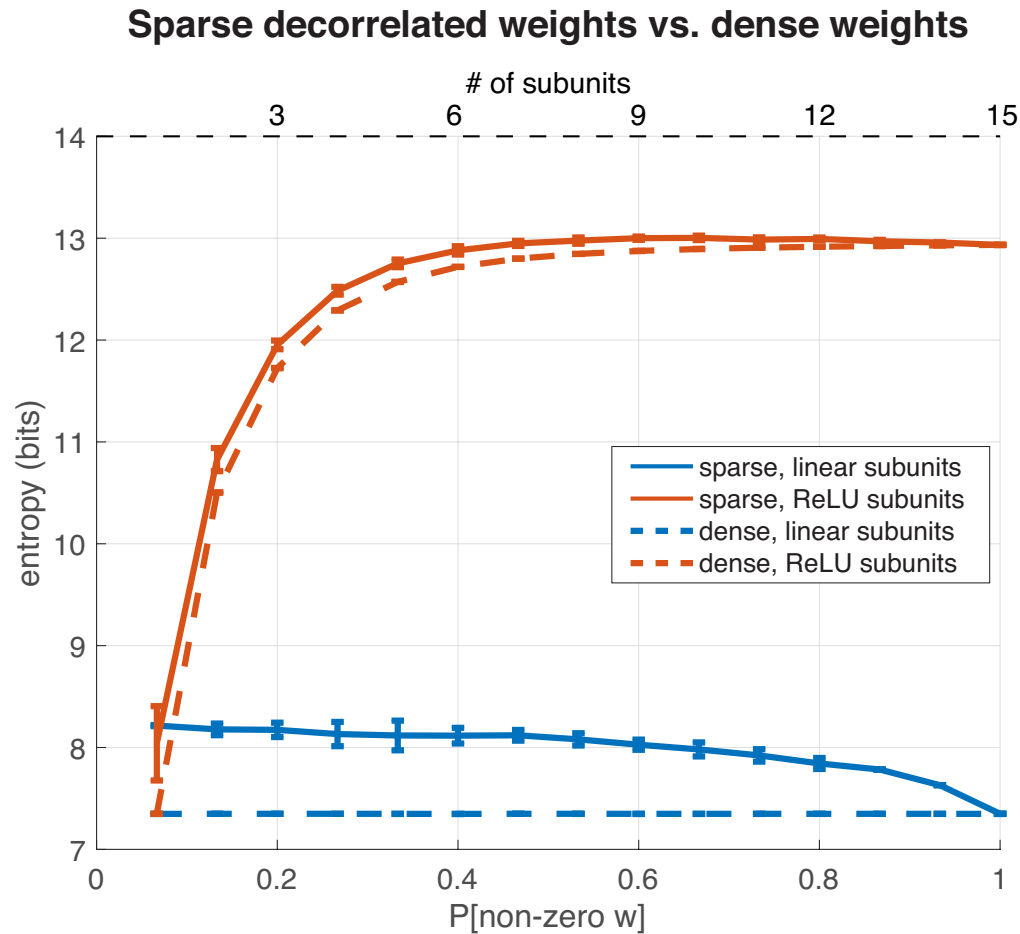

**Fig. S8.** Entropy for circuit configurations with linear and nonlinear subunits. These circuits have an ON and an OFF pathway and rectifying nonlinear outputs. The dashed curves are the non-normalized versions of the black and grey curves from Figure 3F in the main text and they correspond to the top x-axis which indicates the number of convergent subunits. These circuits have the same uniform weightings that were used throughout the main text of the paper. The solid curves represent a sparse weighting of the subunits that decorrelates the ON and OFF pathways. There, the circuits have 15 subunits but the lower x-axis indicates the proportion of those 15 subunit weights that will be non-zero. At  $P[\text{non-zero } w] = 1$ , the weights are fully dense (matching the cases with 15 subunits in the main paper and in the dashed curves), but for lower  $P[\text{non-zero } w]$  the weights are sparser. The subunits with zero weights are randomly chosen and they are independent between the ON and OFF pathways. Each point is the average of 10 simulations. Error bars represent the standard deviation among the 10 simulations. Input signal has  $\sigma_s = 10$ , no circuit noise.

This figure compares the entropy of the divergent circuit when the ON and OFF pathways receive correlated inputs (dense weights) to the entropy when the ON and OFF pathways receive decorrelated inputs (sparse weights). More specifically, it allows one to see how the convergence of some number of subunits is impacted by the correlations, or lack thereof, between the ON and OFF subunits. Starting at the right side of the plot, as the number of subunits is decreased in the dense weight circuits, the entropy decreases for the NSC (as it does in Fig. 3F in the main text). Meanwhile, as  $P[\text{non-zero } w]$  decreases and weights become sparser for the sparse circuits, there is an increase in both the LSC and the NSC entropy relative to the entropy of the dense circuits. However, the sparse LSC entropy does not increase enough to meet that of the NSC until the lowest  $P[\text{non-zero } w]$  is reached - which is where the two circuits are equivalent because the convergence step cannot differentiate them since there is only 1 non-zero subunit.

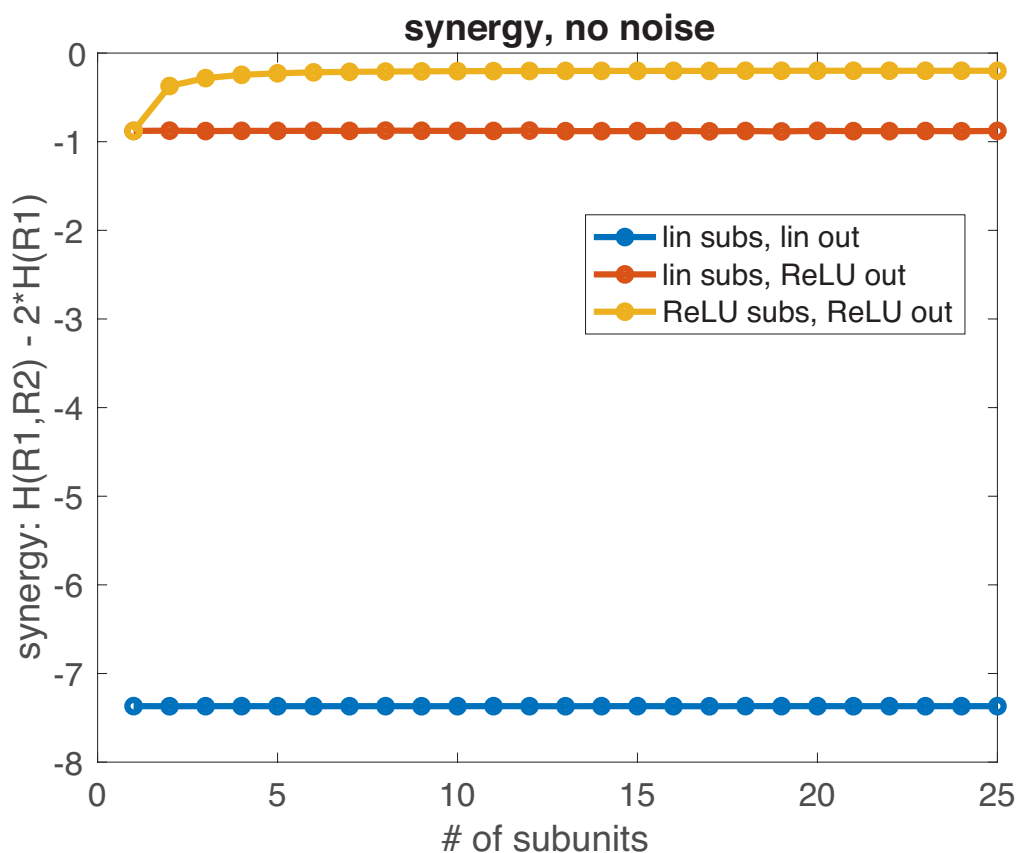

**Fig. S9.** The synergy for 3 circuit configurations as a function of the number of convergent subunits. All circuits have 2 inputs, and diverging ON and OFF pathways.

$$\text{Synergy}(R1,R2) = I(S;R1,R2) - I(S;R1) - I(S;R2)$$

Where I stands for mutual information, R is the output response, and H is entropy. The output responses are deterministic and thus the synergy reduces to:

$$\text{Synergy}(R1,R2) = H(R1,R2) - H(R1) - H(R2)$$

Positive synergy values would indicate that there is more information in the ON and OFF outputs jointly than the sum of the information computed in the ON and OFF outputs separately. Negative synergy values indicate redundancy among the ON and OFF outputs (1–4). The fully linear circuit (blue) has the most redundancy because the ON and OFF outputs contain the same information and are simply anti-correlated. With linear subunits and a rectified output nonlinearity (orange), the redundancy is greatly reduced - it would be zero if it were not for the overlap in outputs for the stimuli that sum to zero. The NSC (yellow) has increasing redundancy as the number of subunits increases. As more responses are freed from the output response manifold, the independence between the ON and OFF outputs saturates.



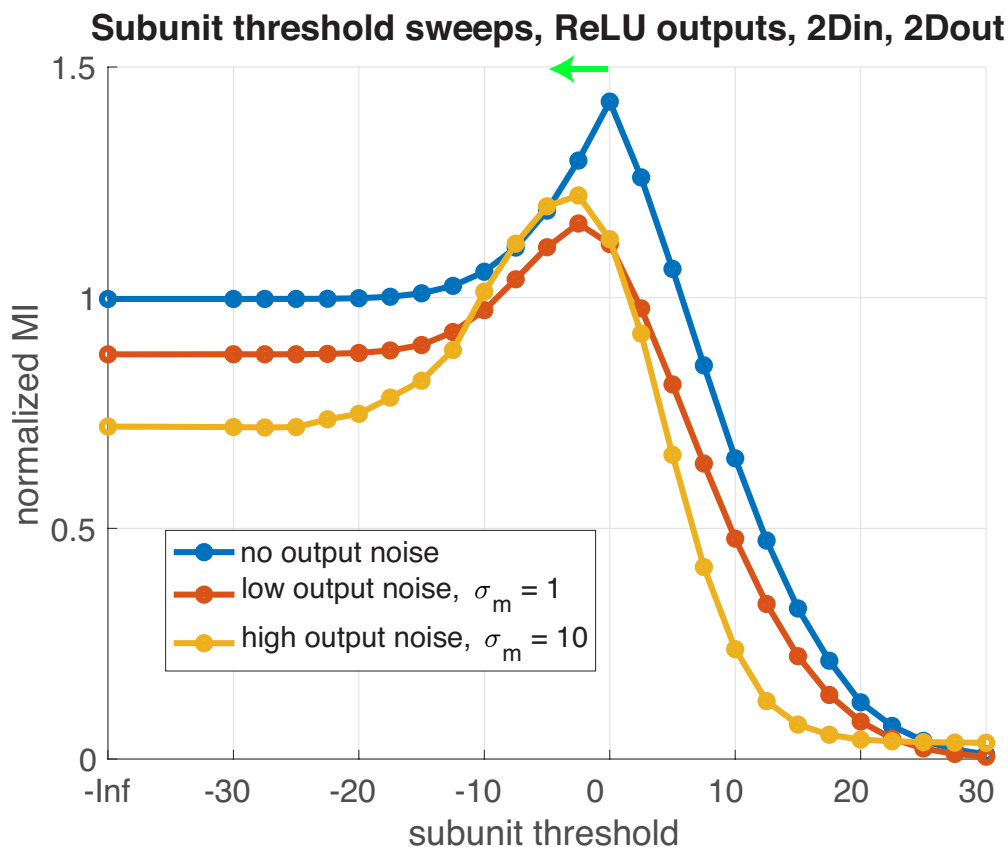

**Fig. S10.** Optimal threshold is more linear with higher noise. In a circuit with 2 nonlinear outputs and 2 subunit inputs each, the optimal subunit threshold depends on the amount of noise after the subunit summation. As in SI Fig. S1, output noise is applied after the subunit summation but before the output nonlinearity is applied. With no noise, the optimal subunit threshold is zero, as corroborated by SI Fig. S3. As noise is increased, the optimal subunit threshold shifts lower towards more linear subunits. A lower subunit threshold allows the ON and OFF pathways to encode some overlapping information which may help the circuit to retain more information when noise has a corrupting effect on the input signals by introducing redundancy.

52 **References**

- 53 1. E Schneidman, W Bialek, MJ Berry, Synergy, Redundancy, and Independence in Population Codes. *J. Neurosci.* **23**,  
54 11539–11553 (2003).
- 55 2. S Nirenberg, SM Carcieri, AL Jacobs, PE Latham, Retinal ganglion cells act largely as independent encoders. *Nature* **411**,  
56 698–701 (2001).
- 57 3. JL Puchalla, E Schneidman, RA Harris, MJ Berry, Redundancy in the Population Code of the Retina. *Neuron* **46**, 493–504  
58 (2005).
- 59 4. N Brenner, SP Strong, R Koberle, W Bialek, RR de Ruyter van Steveninck, Synergy in a Neural Code. *Neural Comput.* **12**,  
60 1531–1552 (2000).
